# Supplementary material for: Factors that influence compliance for referral from primary care to hospital for maternal and neonatal complications in Bosaso, Somalia: a qualitative study
Source: PubMed Central journal article supplement — BMJ Open. 2023 Apr 13;13(4):e070036. doi: 10.1136/bmjopen-2022-070036 (PMC10106055; doi:10.1136/bmjopen-2022-070036), 2023-04-13
Supplement: bmjopen-2022-070036.draft_revisions.pdf [file bmjopen-2022-070036.draft_revisions.pdf]

# BMJ Open

BMJ Open is committed to open peer review. As part of this commitment we make the peer review history of every article we publish publicly available.

When an article is published we post the peer reviewers' comments and the authors' responses online. We also post the versions of the paper that were used during peer review. These are the versions that the peer review comments apply to.

The versions of the paper that follow are the versions that were submitted during the peer review process. They are not the versions of record or the final published versions. They should not be cited or distributed as the published version of this manuscript.

BMJ Open is an open access journal and the full, final, typeset and author-corrected version of record of the manuscript is available on our site with no access controls, subscription charges or pay-per-view fees (<http://bmjopen.bmj.com>).

If you have any questions on BMJ Open's open peer review process please email [info.bmjopen@bmj.com](mailto:info.bmjopen@bmj.com)

# BMJ Open

## Factors that influence compliance for referral from primary care to hospital for maternal and neonatal complications in Bosaso, Somalia: A Qualitative Study

|                               |                                                                                                                                                                                                                                                                                                                                                                                                                                                                                                                                                                                                                        |
|-------------------------------|------------------------------------------------------------------------------------------------------------------------------------------------------------------------------------------------------------------------------------------------------------------------------------------------------------------------------------------------------------------------------------------------------------------------------------------------------------------------------------------------------------------------------------------------------------------------------------------------------------------------|
| Journal:                      | <i>BMJ Open</i>                                                                                                                                                                                                                                                                                                                                                                                                                                                                                                                                                                                                        |
| Manuscript ID                 | bmjopen-2022-070036                                                                                                                                                                                                                                                                                                                                                                                                                                                                                                                                                                                                    |
| Article Type:                 | Original research                                                                                                                                                                                                                                                                                                                                                                                                                                                                                                                                                                                                      |
| Date Submitted by the Author: | 16-Nov-2022                                                                                                                                                                                                                                                                                                                                                                                                                                                                                                                                                                                                            |
| Complete List of Authors:     | Morris, Catherine; Save the Children Federation Inc, Global Health<br>Meehan, Kate; Centers for Disease Control and Prevention, Division of<br>Global Health Protection, Center for Global Health<br>Had, Hussein; Save the Children Somalia<br>Barasa, Sammy; Kenya Medical Training College<br>Hasna , Zainul; Centers for Disease Control and Prevention, Division of<br>Global Health Protection, Center for Global Health<br>Hynes, Michelle; CDC<br>Amsalu, Ribka; University of California San Francisco, Obstetrics,<br>Gynecology & Reproductive Sciences; Save the Children Federation Inc,<br>Global Health |
| Keywords:                     | PUBLIC HEALTH, International health services < HEALTH SERVICES<br>ADMINISTRATION & MANAGEMENT, Organisation of health services <<br>HEALTH SERVICES ADMINISTRATION & MANAGEMENT, Quality in health<br>care < HEALTH SERVICES ADMINISTRATION & MANAGEMENT,<br>QUALITATIVE RESEARCH                                                                                                                                                                                                                                                                                                                                      |
|                               |                                                                                                                                                                                                                                                                                                                                                                                                                                                                                                                                                                                                                        |

SCHOLARONE™  
Manuscripts



I, the Submitting Author has the right to grant and does grant on behalf of all authors of the Work (as defined in the below author licence), an exclusive licence and/or a non-exclusive licence for contributions from authors who are: i) UK Crown employees; ii) where BMJ has agreed a CC-BY licence shall apply, and/or iii) in accordance with the terms applicable for US Federal Government officers or employees acting as part of their official duties; on a worldwide, perpetual, irrevocable, royalty-free basis to BMJ Publishing Group Ltd ("BMJ") its licensees and where the relevant Journal is co-owned by BMJ to the co-owners of the Journal, to publish the Work in this journal and any other BMJ products and to exploit all rights, as set out in our [licence](#).

The Submitting Author accepts and understands that any supply made under these terms is made by BMJ to the Submitting Author unless you are acting as an employee on behalf of your employer or a postgraduate student of an affiliated institution which is paying any applicable article publishing charge ("APC") for Open Access articles. Where the Submitting Author wishes to make the Work available on an Open Access basis (and intends to pay the relevant APC), the terms of reuse of such Open Access shall be governed by a Creative Commons licence – details of these licences and which [Creative Commons](#) licence will apply to this Work are set out in our licence referred to above.

Other than as permitted in any relevant BMJ Author's Self Archiving Policies, I confirm this Work has not been accepted for publication elsewhere, is not being considered for publication elsewhere and does not duplicate material already published. I confirm all authors consent to publication of this Work and authorise the granting of this licence.

1  
2  
3 **1 Factors that influence compliance for referral from primary care to hospital for maternal and**  
4 **2 neonatal complications in Bosaso, Somalia: A Qualitative Study**  
5  
6

7 4 Catherine N Morris <sup>1</sup>, Kate Meehan <sup>2</sup>, Hussein Jama Had <sup>4</sup>, Sammy O Barasa <sup>5</sup>, Hasna Zainul <sup>2</sup>,  
8 5 Michelle Hynes <sup>2</sup>, Ribka Amsalu <sup>1,3</sup>  
9  
10 6  
11 7  
12 8

13 9 **Affiliations:**

14 10 <sup>1</sup> Department of Global Health, Save the Children, Washington, DC 20002, USA

15 11 <sup>2</sup> Division of Global Health Protection, Center for Global Health, US Centers for Disease Control  
16 12 and Prevention, Atlanta, GA. USA

17 13 <sup>3</sup> California Preterm Birth Initiative, Department of Obstetrics, Gynecology & Reproductive  
18 14 Sciences, University of California San Francisco, San Francisco, CA. USA

19 15 <sup>4</sup> Save the Children International, Mogadishu, Somalia.

20 16 <sup>5</sup> Kenya Medical Training College, Nairobi, Kenya  
21  
22  
23  
24

25 19 **Address correspondence to:** Catherine N Morris. Department of Global Health, Save the  
26 20 Children, 899 North Capitol Street NE #900, Washington, DC 20002, USA.

27 21 [katiemorrismph@gmail.com](mailto:katiemorrismph@gmail.com)  
28  
29  
30  
31

32 25 Word count abstract: 300

33  
34 26 Word count manuscript: 5,018

35  
36 27 Number of tables: 2

37  
38 28 Number of Supplemental Figures: 1

39  
40 29 Number of Supplemental Tables: 3

41  
42 30 References: 20  
43  
44  
45  
46  
47  
48  
49  
50  
51  
52  
53  
54  
55  
56  
57  
58  
59  
60

1  
2  
3 1 Abstract  
4 2  
5

6 3 **Objectives:** To estimate referral compliance and examine factors that influence decisions to  
7 4 comply with referral for newborn and maternal complications in Bosaso, Somalia.

9 5 **Setting:** Bosaso, Somalia, is a large port city that hosts a large proportion of internally displaced  
10 6 persons. The study was conducted at the only four primary health centers offering 24/7 delivery  
11 7 services and the only public referral hospital in Bosaso.

12 8 **Participants:** All pregnant women who sought care at four primary centers and were referred to  
13 9 the hospital for maternal complications or mothers whose newborns were referred for neonatal  
14 10 complications were approached for enrollment from September – December 2019. In-depth  
15 11 interviews of 54 women and 14 healthcare workers were conducted.

16 12 **Outcome Measures:** This study examined timely referral compliance from the primary center to  
17 13 the hospital. In-depth interviews were analyzed for a *priori* themes investigating the decision-  
18 14 making process and experience of care for maternal and newborn referrals.

19 15 **Results:** Overall, 94% (n=51/54) of those who were referred, 39 maternal and 12 newborns,  
20 16 complied with the referral and arrived at the hospital within 24 hours. Of the three that did not  
21 17 comply, two delivered on the way, and one cited lack of money as the reason for noncompliance.  
22 18 Four themes emerged: trust in medical authority, cost of transportation and care, quality of care,  
23 19 and communications. The factors that facilitated compliance were the availability of  
24 20 transportation, family support, concern for health, and trust in medical authority. Healthcare  
25 21 workers raised the importance of considering the maternal-newborn dyad throughout the referral  
26 22 process, and the need for official standard operating procedures for referrals including  
27 23 communications between the primary care and the hospital.

28 24 **Conclusions:** High compliance for referral from primary to hospital care for maternal and  
29 25 newborn complications was observed in Bosaso, Somalia. Costs associated with transportation  
30 26 and care at the hospital need attention to motivate compliance.  
31  
32  
33  
34  
35  
36  
37  
38  
39  
40  
41  
42  
43  
44  
45  
46  
47  
48  
49  
50  
51  
52  
53  
54  
55  
56  
57  
58  
59  
60

## 1 **What is already known on this topic**

- 2     ▪ An estimated 15% of pregnant women develop obstetric complications and need access
- 3     to comprehensive obstetric care.
- 4     ▪ Similarly, greater than 15% of newborns with complications of prematurity, infection,
- 5     and other morbidities will require inpatient hospital care.
- 6     ▪ Referrals for maternal and newborn complications from a primary care facility to a
- 7     hospital is common practice in humanitarian and non-humanitarian settings.

## 8 **What this study adds**

- 9     ▪ High (>94%) referral compliance rate from primary care facility to hospital for both
- 10    maternal and neonatal complications can be achieved.
- 11    ▪ Geographical proximity of the primary care facility to the hospital, trust in medical
- 12    advice, concern for their health, and family support facilitated compliance for a referral.
- 13    ▪ All who complied with the referral were admitted to the hospital within hours of arrival at
- 14    the hospital.
- 15    ▪ Coverage of costs associated with transportation from primary care to the hospital and
- 16    coverage of the cost of care provided at the hospital were challenging for the family.
- 17    ▪ Concern about perceived unnecessary intervention at the hospital for maternal and
- 18    newborn complications was raised as a possible deterrent.
- 19    ▪ Maintaining mother-baby dyad and the need for standard operating procedures to
- 20    facilitate communications between levels of care were recommended by healthcare
- 21    workers at the primary level.

## 22 **How this study might affect research, practice, or policy**

- 23    ▪ While there is a high referral compliance rate and a strong family support system that
- 24    facilitated referral, it is critical that coverage of costs associated with transportation and
- 25    care at hospital be taken into consideration in the design and implementation of maternal
- 26    and newborns health programs for communities affected by humanitarian crisis, such as
- 27    Bosaso, Somalia and other similar humanitarian settings.

## 1 Introduction

2 Childbirth is the time of highest risk, when more than 40% of maternal deaths and stillbirths or  
3 neonatal deaths occur. [1] These deaths happen rapidly, and prevention requires a quick response  
4 by health care workers (HCWs) and often a referral to hospital where comprehensive care is  
5 available. Countries affected by conflict have weakened health systems and access to quality  
6 emergency obstetric and neonatal care is limited, resulting in high maternal mortality ratios and  
7 neonatal mortality rates. [2-3] Management of obstetric complications requires skilled HCWs,  
8 specialized care such as surgery or blood transfusions, and availability of services at all times,  
9 which often is restricted to hospital levels. Inpatient hospital care is needed for newborns with  
10 complications such as neonatal sepsis, complications of prematurity or low birthweight, jaundice,  
11 and respiratory distress. Timely referral from primary to hospital level care is essential to save  
12 lives of women and newborns. Most of the existing research is on maternal and newborn health  
13 referrals from home/community to primary care or from community to hospital. [4-6] There is  
14 limited literature on referral compliance and factors that influence compliance of referrals from a  
15 primary care facility to a hospital for maternal and newborn complications. However, overall  
16 delay in receiving care and challenges with transportation have been found in African studies.[7]  
17 We conducted such a study in Bosaso, Puntland, Somalia.

18 Somalia has a high maternal mortality ratio and newborn mortality rate, with 692 maternal  
19 deaths per 100,000 livebirths [7] and 38 newborn deaths per 1,000 livebirths.[8] According to the  
20 Essential Package of Health Services in Somalia, childbirth services are available at the primary  
21 care, referral health center, and hospital level. The Somali Health and Demographic Survey  
22 found that 21% of births occurred in a health facility. [8] Women of reproductive age confront  
23 several challenges to access health services, including lack of money and distance to the health  
24 facility. [8] The crisis in Somalia is characterized by armed conflict, climate shocks, and extreme  
25 poverty which have left 3 million people internally displaced and 7 million people in need of  
26 humanitarian assistance as of 2022. [10] The humanitarian crises have created a shortage of  
27 skilled HCWs, low coverage of health services, and fragile health governance. Within Somalia,  
28 the health system has limited financial resources and most public facilities benefit from  
29 assistance from non-government organizations (NGOs) and United Nations (UN) agencies.[11]  
30 The health care system has four levels – health posts, primary health centers, referral health  
31 centers, and hospitals. [8, 13]

32 This study is an extension of essential newborn care research that took place from 2016 to 2018  
33 at four public primary maternal child health (MCH) centers offering 24/7 delivery services in  
34 Bosaso, Somalia. [13,14] The original study demonstrated it is possible to improve availability  
35 and quality of essential newborn care services at the primary health level in humanitarian settings  
36 like Bosaso, through contextualized evidence-based newborn intervention packages. While  
37 routine newborn care was improved, there were very few small and sick newborns presenting for  
38 care at the primary level. Recognizing that small and sick newborns may require additional care  
39 at the hospital level, the researchers sought to investigate the referral process and referral  
40 compliance from the MCH center to the hospital from the perspective of HCWs and those who  
41 were referred.

## 1 **Methodology**

2 A qualitative study was undertaken to investigate referral pathways, referral compliance, and  
3 factors that influence compliance in Bosaso, Somalia.

## 4 **Study setting**

5 Bosaso, Somalia, is a large port city in the northeastern autonomous region of Puntland that hosts  
6 a large proportion of internally displaced persons. MCH centers are a type of primary health care  
7 facility staffed by midwives, nurses, and community midwives who provide both preventive and  
8 curative services focused on women and children. MCH centers provide delivery care services  
9 for uncomplicated births, however, they lack the capacity for inpatient care and management of  
10 obstetric and neonatal complications. The study was conducted at four MCH centers and the only  
11 public referral hospital in the city which is run by the Ministry of Health.

## 12 **Study population**

13 The study was originally designed to enroll small or sick newborns (0 – 28 days) seeking care at  
14 the MCH, including those delivered at the MCH, who were then referred to a hospital. However,  
15 the number of newborns that were referred were very few. As a result, we expanded the study  
16 population and the study objective to include pregnant women in labor presenting to the MCH  
17 who were referred to the hospital for maternal complications.

18 All pregnant women who sought care at the MCH centers and were referred to the hospital for  
19 maternal complications or mothers whose newborns were referred for neonatal complications  
20 were approached for enrollment at the four selected MCH centers between September 2019 and  
21 December 2019. Those who consented to participate in the study were enrolled at the time of  
22 referral and contacted for an in-depth interview in their homes after completion of the referral or  
23 within 24 hours after referral. The overall sample included 54 women; 41 women were  
24 interviewed for maternal referral and 13 mothers and caretakers were interviewed for newborn  
25 referral.

26 In addition, 14 HCWs who worked in the labor room or cared for newborns at the MCH centers  
27 and at Bosaso Hospital were approached and those who consented were interviewed.

## 28 **Data collection**

29 The 15 enrollment officers and 2 interviewers involved in data collection were all females with a  
30 health science background. They had no affiliation with the facilities where they collected data to  
31 ensure an unbiased, neutral perspective. All were trained in research ethics, the consent process,  
32 and interview methods over five days by two of the co-authors and a research consultant in  
33 Bosaso. Enrollment officers were always present, 24 hours a day 7 days a week, at the four MCH  
34 centers and Bosaso Hospital to monitor when a referral from the MCH to the hospital was issued.  
35 Once clinical staff determined that a referral was required, the enrollment officer approached the  
36 mother or family for consent to participate in the study. Demographic and contact information  
37 were collected from the family at the time of enrollment. The family was contacted (either in  
38

1 person or by phone) within 24 hours after discharge from the hospital to schedule an interview in  
2 their home.

3 The in-depth interview (IDI) guides for mothers and caretakers followed a case study approach  
4 adapted from the conceptual framework for increasing access to care for sick newborns through  
5 community volunteer assessment and referral (Table 1, Supplemental Figure 1). [3-4, 12] After  
6 collecting demographic and outcome information, the interviewer asked about each stage of the  
7 referral process, beginning with the decision to seek care all the way through the referral  
8 experience and discharge. Tools were translated from English to Somali and back translated to  
9 ensure meaning was preserved. The tools were pilot tested in the community and revised over a  
10 one-week period.

11 All interviews were conducted in the Somali language, audio-recorded, transcribed in Somali,  
12 and translated into English. The IDIs lasted between 45 and 90 minutes and were conducted in  
13 private areas to ensure confidentiality.

14 **Table 1. Data Collection Tools**

| Tool                                                     | Data                                                                                                                                                                                                                                                                                                                                                                                                                                                       |
|----------------------------------------------------------|------------------------------------------------------------------------------------------------------------------------------------------------------------------------------------------------------------------------------------------------------------------------------------------------------------------------------------------------------------------------------------------------------------------------------------------------------------|
| Enrollment questionnaire                                 | Demographic information, obstetric history, displacement status, infant information, place of birth (facility or home)                                                                                                                                                                                                                                                                                                                                     |
| Maternal Child Health (MCH) Center referral log          | Referral date and hour, the reason for referral, referral completion status                                                                                                                                                                                                                                                                                                                                                                                |
| Hospital referral log                                    | Admission date and time, reasons for admission, maternal outcome, newborn outcome, length of stay at hospital, discharge / death date and hour                                                                                                                                                                                                                                                                                                             |
| In-depth interview guide: maternal and newborn referrals | Demographic information, birth history of newborn, reasons why they sought care at the MCH center, their experience receiving care at the MCH center, the decision-making process to comply or not with the referral advice by the provider, the referral process from the MCH center to the public hospital, their experience receiving care at the hospital (if the referral was completed), and any post-discharge reflections on the referral process. |
| In-depth interview guide: health care workers            | Health care worker's qualifications, providers' experience caring for small or sick newborns, referring small or sick newborns, and recommendations about the referral process                                                                                                                                                                                                                                                                             |

15

## 16 Analysis

17 Our analytical approach was threefold. First, we conducted a descriptive analysis of the  
18 compliance rate and reasons for referral. Second, a *priori* themes based on the conceptual  
19 framework applied to the IDI guide were followed to organize and upload English translated  
20 versions of the transcripts into MAXQDA 2019 (VERBI Software, 2019) for data analysis.[13]  
21 Finally, the complete set of transcripts were read by two co-authors multiple times to identify  
22 overarching themes and draft a codebook of themes and sub-themes (Supplemental Table 1). The  
23 two co-authors coded six transcripts separately, met to discuss and revise the codebook

1 accordingly. They then coded three transcripts separately and analyzed to ensure inter-coder  
 2 agreement. Disagreements were discussed and resolved until the inter-rater reliability was in the  
 3 90<sup>th</sup> percentile range. The co-authors coded independently until saturation was reached and  
 4 reviewed the remaining transcripts for outlier situations and perspectives. Thematic analysis was  
 5 used to interpret the data, summarize overarching themes, and present findings in the  
 6 respondents' own words.

### 7 **Patient and public involvement statement**

8 Patients and the public were not involved in the study design. A coauthor, data collectors, and  
 9 interviewers were from the community. The coauthor was engaged in the design of the study, the  
 10 data collection, and the dissemination of the findings. The findings of the study have been and  
 11 will continue to be shared for broader dissemination.

## 12 **Results**

### 14 **Participant characteristics**

15 The average age of the referral interview respondents was 26 years, 28% were currently  
 16 displaced, 57% had no formal education, 41% were not able to read, and 93% were not  
 17 employed. The mean gravidity and parity in the sample were 4 and 3 respectively (Supplemental  
 18 Table 2).

### 20 **Referral Compliance**

21 Nearly all (94%, 51 of 54) participants, 39 of 41 maternal referrals and 12 of 13 newborn  
 22 referrals, complied with a referral from the MCH center to a hospital (Supplemental Table 3). Of  
 23 the three patients who did not complete the referral, two respondents gave birth on the way from  
 24 the MCH center to the hospital and decided to return home with their newborns, and one decided  
 25 to return straight home with her sick newborn, citing financial reasons.

26 The time between the referral from the MCH centers to admission at the hospital for maternal  
 27 referrals averaged 4 hours and 17 minutes [range 5 minutes to 20 hours and 37 minutes], and for  
 28 newborn referrals, the average time was 1 hour and 2 minutes [range 7 minutes and 2 hours and  
 29 5 minutes]. All (100%, n =51) maternal and newborn referrals who arrived at the hospital were  
 30 admitted. Of the 39 women who complied with a maternal referral, 37 (95%) had a reason for  
 31 hospital admission recorded in the logbook (Table 2). The mode of delivery for maternal  
 32 referrals were 21 (51%) vaginal births and 20 (49%) cesarean births. There were no maternal  
 33 deaths. Of the 12 newborns who completed referral from the MCH to the hospital, the reason for  
 34 admission for the majority (75%) was respiratory distress.

35 **Table 2. Reasons\* for admission at Bosaso hospital for maternal and newborn referrals**

|                              | n    | %   |
|------------------------------|------|-----|
| Maternal Referrals           | N=39 |     |
| Obstructed / prolonged labor | 13   | 35% |
| Previous cesarean            | 8    | 22% |
| Anemia                       | 7    | 19% |
| Hypertension                 | 4    | 11% |

|                                                                  |      |     |
|------------------------------------------------------------------|------|-----|
| Bleeding                                                         | 2    | 5%  |
| Pre-eclampsia                                                    | 2    | 5%  |
| Other (Hypoxia, placenta previa, post-term, transverse position) | 4    | 11% |
| Missing reason for admission                                     | 2    |     |
| Newborn Referrals                                                | N=12 |     |
| Respiratory distress                                             | 9    | 75% |
| Hypoglycemia                                                     | 2    | 17% |
| Infection                                                        | 1    | 8%  |
| Trouble feeding (Feeding problem)                                | 1    | 8%  |
| *Multiple reasons for admission could be recorded                |      |     |

1

2 For pregnant women who were referred and admitted to the hospital, the average length of stay  
 3 was 4.4 days (range <1 day to 9 days) and 4.7 days (range 1 to 7 days) for a vaginal birth and  
 4 cesarean delivery, respectively. For newborns who were referred to the hospital, the average  
 5 length of stay was 3.45 days (range 1 to 13 days).

## 6 Themes

7 Four themes emerged from the qualitative analysis, which included (a) trust in medical authority  
 8 (b) cost of transportation and care at the hospital (c) quality of care, and (d) communications.

### 9 *Trust in medical authority*

10 The decision for the pregnant woman or caregiver to seek care at an MCH center was made at  
 11 the start of labor, due to a complication with labor, or due to recognition that their newborn was  
 12 sick (recognized symptoms included difficulty breastfeeding, vomiting, and fever).

13 For women who chose to visit the MCH center for delivery, they described the MCH center as  
 14 clean, trustworthy, and reliable, they felt comfortable with the staff there. Many referenced  
 15 proximity and the availability of cost-free health services. Some relied on recommendations from  
 16 family, friends, or neighbors.

17 *“The midwives were with us day and night, and the [girls] were available within*  
 18 *minutes. It is a good place. A clean place. Your blood is continuously measured, you*  
 19 *are being visited regularly and asked about your condition. It was a very well-*  
 20 *organized place.” -Mother of a newborn who was referred, Age 23*

22 Many respondents mentioned how concern for their own health, or the health of their newborn,  
 23 led them to complete the referral to the hospital. Respondents also mentioned trusting the  
 24 medical authority at the MCH centers who advised that the referral was necessary.

25 *“They took the decision immediately because they appreciated the judgment of the health*  
 26 *staff, and they took her to the hospital immediately.” -Woman who was referred, Age 21*

### 27 *Cost of transportation and care at the hospital*

1  
2  
3 1 Most respondents took a taxi or borrowed a car to reach the MCH center, though some women  
4 2 went on foot if they were unable to get transportation. Time to reach the MCH took ten minutes  
5 3 to two hours on foot, or 20 - 60 minutes by car. Women mentioned the cost of transportation as a  
6 4 challenge, and many had to source the funds from others to hire a taxi.

7  
8  
9 5 While almost all the respondents complied with the referral from the MCH to the hospital in a  
10 6 timely manner, they described the challenges they overcame to do so and the factors that  
11 7 weighed into their decision. The most mentioned challenge was finances. Respondents described  
12 8 costs associated with transportation, hospital admission, and treatment. Many families stated that  
13 9 they did not have the money readily available to cover anticipated costs.

14  
15  
16 10 Both HCWs and community respondents brought up the need for a reliable ambulance or free  
17 11 transportation to facilitate referral cases. Transportation availability was also closely linked to  
18 12 finances, as the referral pathway relied on private transport (mostly taxi services) between the  
19 13 MCH center and the hospital. They mentioned that private cars and taxis were not always  
20 14 available or accessible when needed, and the cost could be prohibitive for some families.

21  
22  
23 15 For those who complied with the referral, in some cases, finances limited families from  
24 16 completing care at the hospital. The high cost of care and treatment at the hospital was  
25 17 consistently mentioned, particularly in contrast with the MCH centers, where all treatment and  
26 18 many medications were provided free of charge.

27  
28 19 *“I was worried about the costs at the hospital. There was a time when we had to leave*  
29 20 *the hospital due to finances and go back home. After we found the money, we went back*  
30 21 *to the hospital.” -Mother of a newborn who was referred, Age 19*

31  
32  
33 22 Families were asked to pay some costs upfront, which delayed care when the family had  
34 23 to source the necessary money. Respondents explained that their family members were  
35 24 required to purchase certain medications and supplies from the hospital pharmacy or  
36 25 somewhere outside the compound. Purchasing medicine and supplies was another  
37 26 financial burden. Some women were surprised at the high cost of surgery, medications, or  
38 27 other medical interventions and mentioned that cost could be a barrier to staying at the  
39 28 hospital.

40  
41  
42 30 *“Yes, I very much needed financial help for the services extended to me... the blood*  
43 31 *transfusions were costing money, which I thought were free. The blood was donated by*  
44 32 *my family and my husband. It cost us \$150 total, but we had to stay one more night [to*  
45 33 *find the money] before being discharged” -Woman who was referred, Age 36*

46  
47  
48 34 *“The color of the baby was blue when he was born. They took him to a separate room*  
49 35 *since the baby required oxygen and tube feeding. They measured the blood sugar of the*  
50 36 *baby very frequently. The baby become well at the 5<sup>th</sup> day but still needed hospital*  
51 37 *admission, but we couldn't afford to stay and took him to home.” -Woman who was*  
52 38 *referred, Age 35*

1  
2  
3 1 While challenges to sourcing timely financial support were described in depth, most women  
4 2 were able to find monetary support from family, neighbors, HCWs, and NGOs.

5  
6 3 *“[During the referral] my husband’s sisters were taking care of the child and keeping the*  
7 4 *house, and if somebody is sick, the money is nothing, you can get money, but you can’t*  
8 5 *get health. If a person is bedridden, money will come, it’s compulsory, even if you don’t*  
9 6 *have it yourself.”* -Mother of a newborn who was referred, Age 26

### 11 7 *Quality of care*

12 8  
13 9 After arriving at the MCH center in labor, respondents described receiving a vaginal exam and  
14 10 having their blood pressure taken. After the initial assessment and monitoring of labor, some  
15 11 respondents were sent away and told to return when their labor had progressed. One respondent  
16 12 gave birth on the road on her way home after being told by the MCH staff to return later.

17 13 Many women who went to the MCH while in labor praised the HCWs at the MCH for  
18 14 immediate, attentive care. A few respondents expressed concern that the MCH was too quick to  
19 15 refer without proper assessments, particularly if they arrived at the MCH during the night.

20 16 *“They didn’t give me good care because the staff changed each shift. There was*  
21 17 *an old lady during the night, and she was not active compared to the others in the*  
22 18 *day. In the morning there were active girls. They were measuring the blood*  
23 19 *pressure and did some blood analysis.”* -Woman who was referred, Age 23

24 20  
25 21 Several respondents expressed concern about seeking care at the referral hospital due to fear of  
26 22 medical procedures, like Caesarean section or blood transfusions, or perceived quality of care  
27 23 available at the hospital. While they expressed these fears during the interview, it did not prevent  
28 24 any of the respondents from completing the referral.

29 25  
30 26 At the hospital, respondents who were referred during labor were attended to immediately. Most  
31 27 respondents stated that they were able to receive care soon after arrival at the hospital, or as soon  
32 28 as their condition was deemed as critical. Upon arrival, the hospital staff assessed, treated, and  
33 29 monitored the mother and newborn throughout the labor and delivery process.

34 30 *“When I reached the entrance of the hospital I got out of the car and I walked, although*  
35 31 *it was so difficult to me. Then we saw a nurse and my husband gave her our paper and*  
36 32 *she immediately call the hospital manager and they prepared me for surgery. Then they*  
37 33 *began the surgery, and when I gave birth, they administered oxygen to the baby. My mom*  
38 34 *looked after the baby and my husband looking after me until my conscious become*  
39 35 *normal.”* -Woman who was referred, Age 33

40 36 In a few instances, care was delayed by HCWs’ breaks (late at night, prayer times, and around  
41 37 lunch hour) or by specialist availability, such as for ultrasound.

1  
2  
3 1 The respondents' descriptions of care received by their newborns varied depending on the needs  
4 2 of the newborn. Most newborns referred to the hospital were immediately placed on oxygen,  
5 3 received nasogastric-feeding tubes, and/or were treated for hypoglycemia.

7 4 *"Yes. The bed rent was free. The place was clean. The child was taken care of. They  
8 5 were telling us to take care of the child and feed it. The child was continuously  
9 6 monitored. You will be awakened at night."* -Mother of newborn who was referred,  
11 7 Age 21

13 8  
14 9 *"However, I would suggest that the hospital staff need to help the sick and poor  
15 10 people. They should continuously follow up with their patients, not just come once and  
16 11 not come back. Anything can happen to a sick person at any minute."* -Mother of a  
18 12 newborn who was referred, Age 23

19 13 When interviewed about their baby's health post-discharge, most respondents stated that their  
20 14 child's condition was improved. A few respondents mentioned that they felt their newborns were  
21 15 discharged while they were still unwell, which led to seeking care at different facilities or  
22 16 alternative practitioners. A few women reported returning home from the hospital still feeling ill  
23 17 themselves. Overall, most respondents stated that the quality of care at the hospital was good,  
25 18 though costly.

## 28 20 *Communications*

29 21  
30 22 Most respondents were able to explain why they were referred from the MCH center to the  
31 23 Hospital. For newborns that were referred, many respondents described the reason for referral as  
32 24 related directly to supplies or medications that were not available at the MCH center at the time  
34 25 of care, specifically oxygen, fever medications, and blood tests.

35 26  
36 27 *"I didn't ask them his weight when he was born, and after a week, I took him to  
37 28 get vaccination. He started to vomit, and they said he need to get diagnosed in  
38 29 order to give him medicine, and they couldn't provide it and referred him to the  
40 30 hospital."* -Mother of a newborn who was referred, Age 33

41 31  
42 32 Those born at the hospital with complications were immediately taken to a separate room for  
43 33 treatment. When newborns had to be separated from their mothers, there was often  
44 34 miscommunication between the caretakers and HCWs about the treatment required and the  
45 35 prognosis of the newborn.

46 36  
47 37 Specific to communication for the referral process, multiple HCWs suggested creating official,  
48 38 supported channels of communication and accountability between the MCH and the hospital.  
49 39 The suggestions included official referral slips and communication channels to inform each other  
51 40 of referrals, outcomes, and follow-ups.

52 41  
53 42 *"We counsel them as much as we can and we sometimes pay for the taxi costs. We  
54 43 sometimes give them the ambulance and if the ambulance is not available, then  
56 44 we give them money from our pockets. We convince the family who are with the*

1  
2  
3 1 *mother to take care of the [other] children at home. We tell them the child is at*  
4 2 *risk of dying and the mother should do as much as she can to save [the child], but*  
5 3 *if the child is taken home, nothing can be done for it.” -MCH HCW*  
6 4  
7 5

### 8 5 **Health Care Worker (HCW) perspective on newborn referral**

9 6 To elicit more context on referrals within the Bosaso health system, HCWs were interviewed for  
10 7 their perspectives on newborn referrals. The HCWs at the MCH centers all mentioned a low  
11 8 number of small or sick newborns that seek care at the MCH.

12 9 *“It [cases of small or sick newborns] is not many. They are brought to you in such*  
13 10 *condition, but often the ones that are delivered here are more. Now I remember*  
14 11 *two cases in the whole of last year.” -MCH HCW*  
15 12  
16 13

17 14 At the hospital, contrary to the MCH centers, the HCWs described a high caseload of sick  
18 15 newborns and infants. Low birthweight was cited as a common reason to admit newborns to the  
19 16 hospital, and in such cases, the HCWs provided nasogastric feeding, breastfeeding support, and  
20 17 kangaroo mother care. HCWs mentioned that many of the severe cases are born in the  
21 18 community and have a long distance to travel to seek care at the hospital, and therefore have  
22 19 worse outcomes. At both the MCH and hospital, HCWs identified specialized staff, training, and  
23 20 equipment as areas that need to be improved.

24 21 *“Yes, the equipment's is available but has no usage. And the usage requires*  
25 22 *training so that is the challenging case ... it can be managed if there is no difficult*  
26 23 *condition. But the premature requires an incubator and the incubator is locked in*  
27 24 *a room and we don't have the training, but we have the skills and techniques to*  
28 25 *work.” -Hospital HCW*  
29 26  
30 27

31 28 The MCH staff were not in communication with the hospital to know whether the hospital had  
32 29 enough beds to admit small and sick newborns, nor to alert the hospital that they were sending  
33 30 patients for admission. Additionally, no official documentation was required for referrals of  
34 31 mothers or newborns. If medications were provided, HCWs might write on a blank piece of  
35 32 paper describing the medications given for the patient to take to the hospital. Transportation from  
36 33 the MCH to the hospital was usually by private car or taxi organized by the patient's family. If  
37 34 the referral patient was in critical condition, a HCW would accompany the patient to the hospital,  
38 35 if possible.  
39 36  
40 37

### 41 34 **Discussion**

42 35 Our study found a high rate (94%) of maternal and newborn referral compliance between MCH  
43 36 centers and the public hospital in Bosaso, Somalia. The urban location, proximity between MCH  
44 37 centers and hospitals, availability of transportation, and familial support were facilitators for the  
45 38 high compliance. Respondents attributed their concern for health (their own and their newborn's)  
46 39 and trust in medical authority as primary reasons they completed the referral in a timely manner.  
47 40 Our study also found that most referred patients were admitted and received care soon after  
48 41 arrival. One respondent who was unable to complete the referral cited the financial barrier as the  
49 42 primary reason not to go to the hospital.  
50  
51  
52  
53  
54  
55  
56  
57  
58  
59  
60

1  
2  
3 1 The compliance rate in our study was higher than the compliance rates for referrals from the  
4 2 community level found in other studies in African countries. [4,14] This could be due to the  
5 3 location, the source of referral (facility-based staff instead of community health workers), and  
6 4 the respondent population. Our study participants had demonstrated health care utilization  
7 5 behavior and trusting relationships with providers by already seeking care at the MCH center.  
8 6 Trust in medical authority was described as their main reason for complying with the referral,  
9 7 this is informed by previous personal experience, or family and friends' experiences, on  
10 8 receiving care at the MCH centers. A critical element of a successful referral pathway is a  
11 9 trusting relationship between patient and providers, which requires clear communication on the  
12 10 reasons for the referral and the urgency. [15] When communicated, the concern for the mother-  
13 11 baby wellbeing was a facilitating factor for referral compliance. Two of the three who did not  
14 12 complete the referral did not arrive at the hospital after giving birth on the road as they felt the  
15 13 reasons for referral (prolonged labor and multiparity) were not relevant anymore.

16 14 Distance, cost, and quality of care are often cited as factors for delayed care seeking for maternal  
17 15 health. [16] In our study, most complied with referrals immediately and received care on arrival  
18 16 at the hospital. Our study findings were consistent with the literature in that cost was cited as a  
19 17 barrier for transportation to the appropriate level of care. While most respondents were able to  
20 18 complete the referral, almost all mentioned the financial stress it put on their families to source  
21 19 the money for transportation, hospital care, and medications. Our respondents were able to  
22 20 access financial support from extended family, community members, NGOs, and UNHCR.

23 21 In theory, the referral initiating health facility should inform the receiving health facility, for  
24 22 them to anticipate the patient's medical need and expect their arrival. Similarly, feedback from  
25 23 the receiving health facility back to the referring center will facilitate any follow-up need of the  
26 24 patient and to inform future referrals.[16] In our study setting, there were no formal  
27 25 communications (phone or paper) between the MCH centers and Bosaso Hospital, and this was  
28 26 identified as a key area for improvement by both the HCWs and patients who were referred. This  
29 27 lack of communication between referring and receiving health facilities has been reported as a  
30 28 reason for referral decline or delay in receiving care. [17] While most respondents noted that  
31 29 they were admitted and received timely (within an hour) initiation of care at the hospital, there  
32 30 were respondents that reported delays at the hospital due to staff capacity or staff breaktime.  
33 31 Mobile phones provided by the health system have been used effectively in other settings to  
34 32 increase communications between referring and receiving health facilities. [17]

35 33 When considering programmatic interventions to improve newborn health through referral  
36 34 pathways, the maternal-newborn dyad must be considered in fragile settings like Bosaso,  
37 35 Somalia. Our study showed that HCWs at the primary level were quick to refer complicated  
38 36 deliveries to the hospital level while the mother was still in labor could have contributed to a  
39 37 better birth outcome and maternal survival. In a review of neonatal referrals in Vietnam  
40 38 researchers found that those who self-referred had lower case fatality rate than those referred  
41 39 from provincial hospitals (3.4% versus 21.3%) and attribute the difference to be delay in  
42 40 initiation of appropriate treatment. [18] In our study the MCH was often not used by families for  
43 41 neonatal complications as they preferred to go directly to hospital. While the HCWs respondents

1  
2  
3 1 employed at the MCH could discuss in detail how they would stabilize and treat small or sick  
4 2 newborns, in practice, they referred immediately to the hospital without stabilization  
5 3 interventions for those born at the health facility. The content and quality of pre-referral care in  
6 4 newborn health is an area that needs further investigation.[17]

### 5 **Study strengths and limitations**

6  
7 7 Our study findings are not generalizable to Bosaso or Somalia. First, given that the institutional  
8 8 delivery rate in Somalia is estimated at around 21%, this study population represents a small  
9 9 segment of the general Somali population.[7] Second, the experiences of our study population  
10 10 might be different from the general population on several counts, including the ability to  
11 11 overcome financial challenges in transportation and care at the hospital. Third, our study sites are  
12 12 not reflective of access to hospital care in Somalia in that it is an urban setting, the hospital was  
13 13 near the MCH centers, and the availability of means for transportation in the form of taxicabs  
14 14 that one can call through a mobile phone.

15  
16 16 There is a possibility of social desirability bias in the responses. That said, the fact that the  
17 17 interview was confidential, done outside a health facility, by community members who weren't  
18 18 at the time working at the health facility would have minimized the bias.

19  
20 20 The strength of the study was the high sample size for a qualitative study, the ability to examine  
21 21 factors that affect the decision at all levels for both mother-baby dyad, and our ability to collect  
22 22 perspectives from HCWs. Timing and language used for the interview was a strength in that we  
23 23 waited for the mother-baby dyad to return to their home (not in the middle of a medical crisis),  
24 24 Somali language were used for the interview, and native speakers from the community  
25 25 conducted the interview.

### 26 27 **Conclusion**

28 28 This study found high rates of compliance with referrals from the primary to secondary levels for  
29 29 maternal and newborn referrals. Proximity, concern for health, and trust in medical authority  
30 30 were cited as contributing factors for referral compliance. Cost was the main barrier that  
31 31 impacted the respondents' decisions to seek care and comply with referral and care in this study.

32 32 The HCWs at the MCH centers identified most complications during labor and immediately  
33 33 referred from the MCH center to the hospital. This emphasizes the importance of the maternal-  
34 34 newborn dyad in places like Bosaso, Somalia, and the need for high-quality intrapartum care  
35 35 availability that considers the needs of both the mother and newborn. Without specialized  
36 36 certifications or designated roles, delivery attendants must have the knowledge, skills, and  
37 37 equipment to attend to both the mother and newborn during delivery. Midwives staffing the  
38 38 MCH centers must be able to recognize potential complications and stabilize the patient while  
39 39 arranging transportation to the hospital.

40 40 Our findings illustrate that high compliance can be achieved if circumstances are conducive.  
41 41 Assistance with cost and transportation and improvements to the quality of care and referral  
42 42 processes would help in making referrals to necessary, hospital-level care is more accessible and  
43 43 inclusive in Bosaso.

1

## 2 **Acknowledgments**

3 We would like to thank the women and their family members who consented, participated, and  
4 shared their experiences. We are grateful to Save the Children International's Somalia country  
5 office, the Puntland, Somalia Ministry of Health, the Bosaso MCH center, and hospital health  
6 team who were critical in providing us the approval, logistics, and advice. This project would not  
7 have been possible without the supervision and interview skills of Warsan Osman Salah and Kiin  
8 Jamac Farax, who worked tirelessly to enroll participants, schedule interviews, and conduct  
9 interviews. Additional thanks to Kate Lopes for supporting the data collection training and kick-  
10 off.

## 11 **Contributors**

12 CM drafted the initial manuscript, reviewed and revised the manuscript. CM and KM conducted  
13 data analysis. RA, HH, SB, CM, KM, and MH, contributed to study methodology, development  
14 of tools, data analysis, reviewed and revised the manuscript. ZH reviewed and revised the  
15 manuscript. HH and SB trained data collectors, interviewers and contributed to data quality.

16 All authors approved the final manuscript as submitted and agree to be accountable for all  
17 aspects of the work

## 19 **Funding**

20 Funding was provided through a cooperative agreement with the Centers for Disease Control and  
21 Prevention (Grant U01GH001657). CDC staff contributed to the study design, analysis and  
22 interpretation of results, and review and approval of the manuscript.

23 RA was supported by a University of California San Francisco, Preterm Birth Initiative  
24 transdisciplinary post-doctoral fellowship, funded by Marc and Lynne Benioff and a T32 training  
25 grant (1T32HD098057) from the National Institute of Child Health and Human Development  
26 (NICHD) entitled 'Transdisciplinary Research Training to Reduce Disparities in Preterm Birth  
27 and Improve Maternal and Neonatal Outcomes'. The donor was not involved in the design,  
28 execution or analysis of the study.

## 29 **Competing interests**

30 None declared

## 31 **Patient and public involvement**

32 Patients and/or the public were involved in the design, or conduct, or reporting, or dissemination  
33 plans of this research. Refer to the Methods section for further analysis.

## 35 **Patient consent for publication**

36 Verbal consent obtained

1  
2  
3 **1 Ethics approval**

4 2 Approval for this study was obtained from the Puntland, Somalia Ministry of Health, the Save  
5 3 the Children ethics review committee, and a nonresearch determination by the US Centers for  
6 4 Disease Control and Prevention (CGH HSR Tracking #: 2016-0119). Verbal consent was  
7 5 obtained from women, caretakers, and health care workers. Personal identifiers collected to  
8 6 facilitate interview were destroyed immediately after completion of the data collection process.  
9 7 No identifying information was recorded in the transcripts. Transcripts were only available to the  
10 8 research staff.

11  
12  
13  
14 **9 Data availability statement**

15 10 The excerpts of the transcripts relevant to the study have been shared in the manuscript. There is  
16 11 no additional data available.

17  
18 12 Disclaimer: The findings and conclusions in this report are those of the authors and do not  
19 13 necessarily reflect the official policy or position of the U.S. Centers for Disease Control and  
20 14 Prevention, nor the United States Government.

## 1 References

- 2 1. Lawn JE, Blencowe H, Oza S, et al. Every Newborn: progress, priorities, and potential  
3 beyond survival [published correction appears in *Lancet*. 2014 Jul  
4 12;384(9938):132]. *Lancet*. 2014;384(9938):189-205. doi:10.1016/S0140-6736(14)60496-7
- 5 2. Bendavid E, Boerma T, Akseer N, et al. The effects of armed conflict on the health of  
6 women and children. *Lancet*. 2021;397(10273):522-532. doi:10.1016/S0140-  
7 6736(21)00131-8
- 8 3. Akseer N, Wright J, Tasic H, et al. Women, children and adolescents in conflict countries:  
9 an assessment of inequalities in intervention coverage and survival. *BMJ Glob Health*.  
10 2020;5(1):e002214. Published 2020 Jan 26. doi:10.1136/bmjgh-2019-002214
- 11 4. Herbert HK, Lee AC, Chandran A, Rudan I, Baqui AH. Care seeking for neonatal illness in  
12 low- and middle-income countries: a systematic review. *PLoS Med*. 2012;9(3):e1001183.  
13 doi:10.1371/journal.pmed.1001183
- 14 5. Kozuki N, Guenther T, Vaz L, et al. A systematic review of community-to-facility neonatal  
15 referral completion rates in Africa and Asia. *BMC Public Health*. 2015;15:989. Published  
16 2015 Sep 30. doi:10.1186/s12889-015-2330-0
- 17 6. Manu A, Hill Z, Ten Asbroek AH, et al. Increasing access to care for sick newborns:  
18 evidence from the Ghana Newhints cluster-randomised controlled trial. *BMJ Open*.  
19 2016;6(6):e008107. Published 2016 Jun 13. doi:10.1136/bmjopen-2015-008107
- 20 7. Waiswa P, Kallander K, Peterson S, Tomson G, Pariyo GW. Using the three delays model  
21 to understand why newborn babies die in eastern Uganda. *Trop Med Int Health*.  
22 2010;15(8):964-972. doi:10.1111/j.1365-3156.2010.02557.x
- 23 8. Directorate of National Statistics, Federal Government of Somalia. The Somali Health and  
24 Demographic Survey 2020. Available at [https://somalia.unfpa.org/sites/default/files/pub-  
25 pdf/FINAL%20SHDS%20Report%202020\\_V7\\_0.pdf](https://somalia.unfpa.org/sites/default/files/pub-pdf/FINAL%20SHDS%20Report%202020_V7_0.pdf). Accessed on September 2<sup>nd</sup>, 2022
- 26 9. United Nations Children's Fund (UNICEF), World Health Organization (WHO), World  
27 Bank Group, United Nations . Levels & Trends in Child Mortality: Report 2019. Estimates  
28 developed by the UN Interagency Group for Child Mortality Estimation. New York, USA:  
29 UNICEF, WHO, 2019.
- 30 10. United Nations Office for Coordination of Humanitarian Affairs. Available at  
31 <https://www.unocha.org/somalia/about-ocha-somalia> Accessed on Sept 2<sup>nd</sup>, 2022
- 32 11. Ahmed Z, Atallahjan A, Gaffey MF, et al. Understanding the factors affecting the  
33 humanitarian health and nutrition response for women and children in Somalia since 2000:  
34 a case study. *Confl Health*. 2020;14:35. Published 2020 May 27. doi:10.1186/s13031-019-  
35 0241-x
- 36 12. Ansah Manu A, ten Asbroek A, Soremekun S, Gyan T, Weobong B, Tawiah-Agyemang C,  
37 Danso S, Amenga-Etego S, Owusu-Agyei S, Hill Z, Kirkwood BR. Evaluating the  
38 implementation of community volunteer assessment and referral of sick babies: lessons  
39 learned from the Ghana Newhints home visits cluster randomized controlled trial. *Health  
40 Policy Plan*. 2014 Sep;29 Suppl 2(Suppl 2):ii114-27. doi: 10.1093/heapol/czu080. PMID:  
41 25274636; PMCID: PMC4202912.

- 1  
2  
3 1 13. Amsalu R, Morris CN, Chukwumalu K, et al. Essential newborn care practice at four  
4 2 primary health facilities in conflict affected areas of Bossaso, Somalia: a cross-sectional  
5 3 study. *Confl Health*. 2019;13:27. Published 2019 Jun 13. doi:10.1186/s13031-019-0202-4  
6 4  
7 4 14. Amsalu R, Morris CN, Hynes M, et al. Effectiveness of clinical training on improving  
8 5 essential newborn care practices in Bossaso, Somalia: a pre and postintervention  
9 6 study. *BMC Pediatr*. 2020;20(1):215. Published 2020 May 13. doi:10.1186/s12887-020-  
10 7 02120-x  
11 8  
12 8 15. VERBI Software. (2021). MAXQDA 2022 [computer software]. Berlin, Germany: VERBI  
13 9 Software. Available from maxqda.com  
14 10  
15 10 16. Nalwadda CK, Waiswa P, Kiguli J, et al. High compliance with newborn community-to-  
16 11 facility referral in eastern Uganda: an opportunity to improve newborn survival. *PLoS One*.  
17 12 2013;8(11):e81610. Published 2013 Nov 29. doi:10.1371/journal.pone.0081610  
18 13  
19 14 17. Pembe AB, Mbekenga CK, Olsson P, Darj E. Why do women not adhere to advice on  
20 15 maternal referral in rural Tanzania? Narratives of women and their family members. *Glob*  
21 16 *Health Action*. 2017;10(1):1364888. doi:10.1080/16549716.2017.1364888  
22 17  
23 17 18. Thaddeus S, Maine D. Too far to walk: maternal mortality in context. *Soc Sci Med*.  
24 18 1994;38(8):1091-1110. doi:10.1016/0277-9536(94)90226-7  
25 19  
26 19 19. Avoka CK, McArthur E, Banke-Thomas A. Interventions to improve obstetric emergency  
27 20 referral decision making, communication and feedback between health facilities in sub-  
28 21 Saharan Africa: A systematic review. *Trop Med Int Health*. 2022;27(5):494-509.  
29 22 doi:10.1111/tmi.13747  
30 23  
31 23 20. Miles M, Dung KT, Ha LT, et al. The cause-specific morbidity and mortality, and referral  
32 24 patterns of all neonates admitted to a tertiary referral hospital in the northern provinces of  
33 25 Vietnam over a one year period. *PLoS One*. 2017;12(3):e0173407. Published 2017 Mar 10.  
34 26 doi:10.1371/journal.pone.0173407  
35  
36  
37  
38  
39  
40  
41  
42  
43  
44  
45  
46  
47  
48  
49  
50  
51  
52  
53  
54  
55  
56  
57  
58  
59  
60

## 1 Supplemental Reference Tables

2  
3 Supplemental Table 1: Codebook

| Codebook                               |                                                                 |
|----------------------------------------|-----------------------------------------------------------------|
| Parent Code                            | Sub-code                                                        |
| The Decision to Seek Care              | Reasons for Initially Seeking Care                              |
|                                        | Recognizing Newborn Danger Signs                                |
|                                        | Reasons for choosing initial care facility                      |
|                                        | Process to seek initial Care                                    |
| Care and Referral at the MCH           | Care for Mother received at MCH                                 |
|                                        | Care for Newborn received at MCH                                |
|                                        | Supplies and Medications at MCH                                 |
|                                        | Opinions about Quality of Care received at MCH                  |
|                                        | Reasons for Referral                                            |
|                                        | Advice from HCWs                                                |
|                                        | Referral Documentation                                          |
| The Referral Decision                  | Factors: Finances                                               |
|                                        | Factors: Concern for Health                                     |
|                                        | Factors: Transportation                                         |
|                                        | Factors: Trust in Medical Authority                             |
|                                        | Factors: Religious / Socio-cultural Influences                  |
|                                        | Factors: Concerns about medical procedures at referral facility |
|                                        | Factors: Belief about quality of care at referral facility      |
|                                        | Factors: Concern about home responsibilities                    |
| The Referral Process                   | Factors: Familial Influences                                    |
|                                        | Patient Experience of Referral                                  |
|                                        | Referral Procedures                                             |
| Care at the Referral Hospital          | Referral Companions                                             |
|                                        | Care for Mother received at Hospital                            |
|                                        | Care for Newborn received at Hospital                           |
|                                        | Supplies and Medications at the Hospital                        |
|                                        | Opinions about Quality of Care received at Hospital             |
|                                        | Compliance with Treatment Plan                                  |
| Recommendations for Improvement        | Post Discharge Health Issues                                    |
|                                        | Community Education and Awareness                               |
|                                        | Transportation                                                  |
|                                        | Subsidized / Free care at the Hospital                          |
|                                        | Training for HCWs                                               |
|                                        | Supplies and Equipment at MCH and Hospital                      |
|                                        | Referral Processes                                              |
| Quality of Care at Hospital            |                                                                 |
| Formal connection of MCHs and Hospital |                                                                 |

## 1 Supplemental Figure 1. Referral Pathway Conceptual Framework



2

3

## 4 Supplemental Table 2: Demographics of Study Participants

| Respondent Demographics          |                               | N= 54 | %   |
|----------------------------------|-------------------------------|-------|-----|
| Age                              | Average Age                   | 26    |     |
| Gravidity                        | Average Number of Pregnancies | 3.7   |     |
| Livebirths                       | Average Livebirths            | 3.1   |     |
| Current Number of Children Alive |                               | 3     |     |
| Displacement Status              | Yes                           | 15    | 28% |
|                                  | No                            | 38    | 70% |
|                                  | No Response                   | 1     | 2%  |
| Occupation of Mother             | Government                    | 1     | 2%  |
|                                  | Small Business                | 1     | 2%  |
|                                  | Other                         | 2     | 4%  |
|                                  | Not Employed                  | 50    | 93% |
| Occupation of Father             | Agriculture                   | 2     | 4%  |
|                                  | Fishing                       | 2     | 4%  |
|                                  | Government                    | 3     | 6%  |
|                                  | Small Business                | 5     | 9%  |
|                                  | Other                         | 29    | 54% |
|                                  | Not Employed                  | 7     | 13% |
|                                  | No Response                   | 6     | 11% |

2

|                     |                     |    |     |
|---------------------|---------------------|----|-----|
| Education of Mother | No Formal Education | 31 | 57% |
|                     | Primary             | 14 | 26% |
|                     | Secondary           | 5  | 9%  |
|                     | Associates          | 1  | 2%  |
|                     | Bachelor            | 2  | 4%  |
|                     | No Response         | 1  | 2%  |
| Education of Father | No Formal Education | 21 | 39% |
|                     | Primary             | 12 | 22% |
|                     | Secondary           | 7  | 13% |
|                     | Associates          | 0  | 0%  |
|                     | Bachelor            | 6  | 11% |
|                     | Masters or Higher   | 2  | 4%  |
|                     | No Response         | 6  | 11% |
| Literacy            | Yes                 | 28 | 52% |
|                     | No                  | 22 | 41% |
|                     | No Response         | 4  | 7%  |

**Supplemental Table 3: Referral Outcomes**

| <b>Referral Compliance (went to hospital within 24 hours) N=54:</b> |              |    |     |                                                                                                                                              |
|---------------------------------------------------------------------|--------------|----|-----|----------------------------------------------------------------------------------------------------------------------------------------------|
| Maternal Referrals                                                  | Compliant    | 39 | 95% | NOTE: 2 chose to go to a private hospital instead of Bosaso hospital, but went within 24 hours                                               |
|                                                                     | Noncompliant | 2  | 5%  | NOTE: In both cases, the mother delivered on her way from the MCH to the hospital and decided to return home instead of continue to hospital |
| Newborn Referrals                                                   | Compliant    | 12 | 92% |                                                                                                                                              |
|                                                                     | Noncompliant | 1  | 8%  | NOTE: cited financial reasons                                                                                                                |
| MNH Referrals                                                       | Compliant    | 51 | 94% |                                                                                                                                              |
|                                                                     | Noncompliant | 3  | 6%  | *Note 1 cited finances, 2 delivered enroute & returned home                                                                                  |

| <b>Referral Time (between MCH referral and admission to Hospital)</b> |                        |              |  |
|-----------------------------------------------------------------------|------------------------|--------------|--|
| Maternal Referrals                                                    | Average length of time | 4hr 17 min   |  |
|                                                                       | Shortest Referral Time | 5 min        |  |
|                                                                       | Longest Referral Time  | 20 hr 37 min |  |
| Newborn Referrals                                                     | Average length of time | 1hr 2 min    |  |
|                                                                       | Shortest Referral Time | 7 min        |  |
|                                                                       | Longest Referral Time  | 2 hr 5 min   |  |

| <b>Type of Delivery, n = 41</b> |                  |    |     |
|---------------------------------|------------------|----|-----|
| Maternal Referral               | Cesarean         | 20 | 49% |
|                                 | Vaginal Delivery | 21 | 51% |

NOTE: 2 were on the road, 1 was a known stillbirth

| <b>Newborn Outcome (at Hospital), n =43</b> |                             |    |     |                                                        |
|---------------------------------------------|-----------------------------|----|-----|--------------------------------------------------------|
| Maternal Referrals                          | Alive and Healthy           | 21 | 49% | Includes 1 set of healthy twins                        |
|                                             | Alive but Unwell*           | 16 | 37% | Required some sort of specialized newborn intervention |
|                                             | Stillbirth                  | 2  | 5%  |                                                        |
|                                             | Early neonatal Death <24 hr | 4  | 9%  | Includes 1 set of twins who both died                  |

| <b>Newborn Outcome (at Hospital), n = 12</b> |                        |   |     |
|----------------------------------------------|------------------------|---|-----|
| Newborn Referrals                            | Discharged by Provider | 9 | 75% |
|                                              | Death                  | 3 | 25% |

| <b>Reason for Referral (Multiple reasons considered), n = 41</b> |                              |    |     |
|------------------------------------------------------------------|------------------------------|----|-----|
| Maternal Referrals                                               | Obstructed / Prolonged Labor | 16 | 39% |
|                                                                  | Anemia / Blood Transfusion   | 7  | 17% |

|  |                   |   |     |                                                                           |
|--|-------------------|---|-----|---------------------------------------------------------------------------|
|  | Hypertension      | 5 | 12% |                                                                           |
|  | Previous Cesarean | 4 | 10% |                                                                           |
|  | Bleeding          | 2 | 5%  |                                                                           |
|  | Breech Position   | 2 | 5%  |                                                                           |
|  | Placenta Previa   | 2 | 5%  |                                                                           |
|  | PROM              | 2 | 5%  |                                                                           |
|  | Ultrasound        | 2 | 5%  |                                                                           |
|  | OTHER             | 5 | 12% | (Injury, low blood pressure, multiparity, oligohydramnios, pre-eclampsia) |

**Reason for Admission (Multiple reasons considered), n = 37**

|                    |                              |    |     |                                                            |
|--------------------|------------------------------|----|-----|------------------------------------------------------------|
| Maternal Referrals | Obstructed / Prolonged Labor | 13 | 35% |                                                            |
|                    | Previous Cesarean            | 8  | 22% |                                                            |
|                    | Anemia                       | 7  | 19% |                                                            |
|                    | Hypertension                 | 4  | 11% |                                                            |
|                    | Bleeding                     | 2  | 5%  |                                                            |
|                    | Pre-eclampsia                | 2  | 5%  |                                                            |
|                    | OTHER                        | 4  | 11% | (Hypoxia, placenta previa, post-term, transverse position) |
|                    | Unrecorded / Missing Data    | 2  | 5%  |                                                            |

**Reason for Referral (Multiple reasons considered), n = 13**

|                   |                      |   |     |  |
|-------------------|----------------------|---|-----|--|
| Newborn Referrals | Respiratory Distress | 8 | 62% |  |
|                   | Infection            | 2 | 15% |  |
|                   | Hypoglycemia         | 2 | 15% |  |
|                   | Hypothermia          | 1 | 8%  |  |
|                   | Other                | 1 | 8%  |  |

**Reason for Admission (Multiple reasons considered), n = 12**

|                   |                      |   |     |  |
|-------------------|----------------------|---|-----|--|
| Newborn Referrals | Respiratory Distress | 9 | 75% |  |
|                   | Hypoglycemia         | 2 | 17% |  |
|                   | Infection            | 1 | 8%  |  |
|                   | Trouble Feeding      | 1 | 8%  |  |

## Standards for Reporting Qualitative Research (SRQR)\*

<http://www.equator-network.org/reporting-guidelines/srqr/>

Page/line no(s).

### Title and abstract

|                                                                                                                                                                                                                                                              |                              |
|--------------------------------------------------------------------------------------------------------------------------------------------------------------------------------------------------------------------------------------------------------------|------------------------------|
| <p><b>Title</b> - Concise description of the nature and topic of the study Identifying the study as qualitative or indicating the approach (e.g., ethnography, grounded theory) or data collection methods (e.g., interview, focus group) is recommended</p> | <p>Page 1<br/>Lines 1-2</p>  |
| <p><b>Abstract</b> - Summary of key elements of the study using the abstract format of the intended publication; typically includes background, purpose, methods, results, and conclusions</p>                                                               | <p>Page 2<br/>Lines 1-25</p> |

### Introduction

|                                                                                                                                                                     |                                 |
|---------------------------------------------------------------------------------------------------------------------------------------------------------------------|---------------------------------|
| <p><b>Problem formulation</b> - Description and significance of the problem/phenomenon studied; review of relevant theory and empirical work; problem statement</p> | <p>Page 4<br/>Lines 2 - 17</p>  |
| <p><b>Purpose or research question</b> - Purpose of the study and specific objectives or questions</p>                                                              | <p>Page 4<br/>Lines 38 - 41</p> |

### Methods

|                                                                                                                                                                                                                                                                                                                                                                                                             |                                   |
|-------------------------------------------------------------------------------------------------------------------------------------------------------------------------------------------------------------------------------------------------------------------------------------------------------------------------------------------------------------------------------------------------------------|-----------------------------------|
| <p><b>Qualitative approach and research paradigm</b> - Qualitative approach (e.g., ethnography, grounded theory, case study, phenomenology, narrative research) and guiding theory if appropriate; identifying the research paradigm (e.g., postpositivist, constructivist/ interpretivist) is also recommended; rationale**</p>                                                                            | <p>Pages 5-6</p>                  |
| <p><b>Researcher characteristics and reflexivity</b> - Researchers' characteristics that may influence the research, including personal attributes, qualifications/experience, relationship with participants, assumptions, and/or presuppositions; potential or actual interaction between researchers' characteristics and the research questions, approach, methods, results, and/or transferability</p> | <p>Page 5<br/>Lines 30 - 34</p>   |
| <p><b>Context</b> - Setting/site and salient contextual factors; rationale**</p>                                                                                                                                                                                                                                                                                                                            | <p>Page 5<br/>Lines 5 - 11</p>    |
| <p><b>Sampling strategy</b> - How and why research participants, documents, or events were selected; criteria for deciding when no further sampling was necessary (e.g., sampling saturation); rationale**</p>                                                                                                                                                                                              | <p>Page 5<br/>Lines 13 - 27</p>   |
| <p><b>Ethical issues pertaining to human subjects</b> - Documentation of approval by an appropriate ethics review board and participant consent, or explanation for lack thereof; other confidentiality and data security issues</p>                                                                                                                                                                        | <p>Page 16<br/>Lines 1-7</p>      |
| <p><b>Data collection methods</b> - Types of data collected; details of data collection procedures including (as appropriate) start and stop dates of data collection and analysis, iterative process, triangulation of sources/methods, and modification of procedures in response to evolving study findings; rationale**</p>                                                                             | <p>Page 5-6<br/>Lines 30 - 12</p> |

|                       |                                                                                                                                                                                                                                                       |                            |
|-----------------------|-------------------------------------------------------------------------------------------------------------------------------------------------------------------------------------------------------------------------------------------------------|----------------------------|
| 1<br>2<br>3<br>4<br>5 | <b>Data collection instruments and technologies</b> - Description of instruments (e.g., interview guides, questionnaires) and devices (e.g., audio recorders) used for data collection; if/how the instrument(s) changed over the course of the study | Page 6<br>Lines 3 - 14     |
| 6<br>7<br>8           | <b>Units of study</b> - Number and relevant characteristics of participants, documents, or events included in the study; level of participation (could be reported in results)                                                                        | Page 7<br>Lines 12-15      |
| 9<br>10<br>11<br>12   | <b>Data processing</b> - Methods for processing data prior to and during analysis, including transcription, data entry, data management and security, verification of data integrity, data coding, and anonymization/de-identification of excerpts    | Pages 6-7<br>Lines 16 - 4  |
| 13<br>14<br>15<br>16  | <b>Data analysis</b> - Process by which inferences, themes, etc., were identified and developed, including the researchers involved in data analysis; usually references a specific paradigm or approach; rationale**                                 | Pages 6 – 7<br>Lines 16 -4 |
| 17<br>18<br>19<br>20  | <b>Techniques to enhance trustworthiness</b> - Techniques to enhance trustworthiness and credibility of data analysis (e.g., member checking, audit trail, triangulation); rationale**                                                                | Page 6<br>Lines 20 - 23    |

## Results/findings

|                      |                                                                                                                                                                                                   |              |
|----------------------|---------------------------------------------------------------------------------------------------------------------------------------------------------------------------------------------------|--------------|
| 23<br>24<br>25<br>26 | <b>Synthesis and interpretation</b> - Main findings (e.g., interpretations, inferences, and themes); might include development of a theory or model, or integration with prior research or theory | Pages 7 - 12 |
| 27<br>28<br>29       | <b>Links to empirical data</b> - Evidence (e.g., quotes, field notes, text excerpts, photographs) to substantiate analytic findings                                                               | Pages 8 - 12 |

## Discussion

|                                        |                                                                                                                                                                                                                                                                                                                                                                                                             |                          |
|----------------------------------------|-------------------------------------------------------------------------------------------------------------------------------------------------------------------------------------------------------------------------------------------------------------------------------------------------------------------------------------------------------------------------------------------------------------|--------------------------|
| 32<br>33<br>34<br>35<br>36<br>37<br>38 | <b>Integration with prior work, implications, transferability, and contribution(s) to the field</b> - Short summary of main findings; explanation of how findings and conclusions connect to, support, elaborate on, or challenge conclusions of earlier scholarship; discussion of scope of application/generalizability; identification of unique contribution(s) to scholarship in a discipline or field | Pages 12 - 14<br>Page 14 |
| 39<br>40                               | <b>Limitations</b> - Trustworthiness and limitations of findings                                                                                                                                                                                                                                                                                                                                            | Lines 7 - 25             |

## Other

|                |                                                                                                                                               |                          |
|----------------|-----------------------------------------------------------------------------------------------------------------------------------------------|--------------------------|
| 43<br>44<br>45 | <b>Conflicts of interest</b> - Potential sources of influence or perceived influence on study conduct and conclusions; how these were managed | Page 15<br>Line 30       |
| 46<br>47<br>48 | <b>Funding</b> - Sources of funding and other support; role of funders in data collection, interpretation, and reporting                      | Page 15<br>Lines 20 - 28 |

\*The authors created the SRQR by searching the literature to identify guidelines, reporting standards, and critical appraisal criteria for qualitative research; reviewing the reference lists of retrieved sources; and contacting experts to gain feedback. The SRQR aims to improve the transparency of all aspects of qualitative research by providing clear standards for reporting qualitative research.

1  
2  
3  
4  
5  
6  
7  
8  
9  
10  
11  
12  
13  
14  
15  
16  
17  
18  
19  
20  
21  
22  
23  
24  
25  
26  
27  
28  
29  
30  
31  
32  
33  
34  
35  
36  
37  
38  
39  
40  
41  
42  
43  
44  
45  
46  
47  
48  
49  
50  
51  
52  
53  
54  
55  
56  
57  
58  
59  
60

\*\*The rationale should briefly discuss the justification for choosing that theory, approach, method, or technique rather than other options available, the assumptions and limitations implicit in those choices, and how those choices influence study conclusions and transferability. As appropriate, the rationale for several items might be discussed together.

**Reference:**

O'Brien BC, Harris IB, Beckman TJ, Reed DA, Cook DA. **Standards for reporting qualitative research: a synthesis of recommendations.** *Academic Medicine*, Vol. 89, No. 9 / Sept 2014  
DOI: 10.1097/ACM.0000000000000388

For peer review only

# BMJ Open

## Factors that influence compliance for referral from primary care to hospital for maternal and neonatal complications in Bosaso, Somalia: A Qualitative Study

|                                 |                                                                                                                                                                                                                                                                                                                                                                                                                                                                                                                                                                                          |
|---------------------------------|------------------------------------------------------------------------------------------------------------------------------------------------------------------------------------------------------------------------------------------------------------------------------------------------------------------------------------------------------------------------------------------------------------------------------------------------------------------------------------------------------------------------------------------------------------------------------------------|
| Journal:                        | <i>BMJ Open</i>                                                                                                                                                                                                                                                                                                                                                                                                                                                                                                                                                                          |
| Manuscript ID                   | bmjopen-2022-070036.R1                                                                                                                                                                                                                                                                                                                                                                                                                                                                                                                                                                   |
| Article Type:                   | Original research                                                                                                                                                                                                                                                                                                                                                                                                                                                                                                                                                                        |
| Date Submitted by the Author:   | 10-Feb-2023                                                                                                                                                                                                                                                                                                                                                                                                                                                                                                                                                                              |
| Complete List of Authors:       | Morris, Catherine; Save the Children Federation Inc, Global Health Meehan, Kate; Centers for Disease Control and Prevention, Division of Global Health Protection, Center for Global Health Had, Hussein; Save the Children Somalia Barasa, Sammy; Kenya Medical Training College Hasna , Zainul; Centers for Disease Control and Prevention, Division of Global Health Protection, Center for Global Health Hynes, Michelle; CDC Amsalu, Ribka; University of California San Francisco, Obstetrics, Gynecology & Reproductive Sciences; Save the Children Federation Inc, Global Health |
| <b>Primary Subject Heading</b>: | Global health                                                                                                                                                                                                                                                                                                                                                                                                                                                                                                                                                                            |
| Secondary Subject Heading:      | Public health                                                                                                                                                                                                                                                                                                                                                                                                                                                                                                                                                                            |
| Keywords:                       | PUBLIC HEALTH, International health services < HEALTH SERVICES ADMINISTRATION & MANAGEMENT, Organisation of health services < HEALTH SERVICES ADMINISTRATION & MANAGEMENT, Quality in health care < HEALTH SERVICES ADMINISTRATION & MANAGEMENT, QUALITATIVE RESEARCH                                                                                                                                                                                                                                                                                                                    |
|                                 |                                                                                                                                                                                                                                                                                                                                                                                                                                                                                                                                                                                          |

SCHOLARONE™  
Manuscripts



I, the Submitting Author has the right to grant and does grant on behalf of all authors of the Work (as defined in the below author licence), an exclusive licence and/or a non-exclusive licence for contributions from authors who are: i) UK Crown employees; ii) where BMJ has agreed a CC-BY licence shall apply, and/or iii) in accordance with the terms applicable for US Federal Government officers or employees acting as part of their official duties; on a worldwide, perpetual, irrevocable, royalty-free basis to BMJ Publishing Group Ltd ("BMJ") its licensees and where the relevant Journal is co-owned by BMJ to the co-owners of the Journal, to publish the Work in this journal and any other BMJ products and to exploit all rights, as set out in our [licence](#).

The Submitting Author accepts and understands that any supply made under these terms is made by BMJ to the Submitting Author unless you are acting as an employee on behalf of your employer or a postgraduate student of an affiliated institution which is paying any applicable article publishing charge ("APC") for Open Access articles. Where the Submitting Author wishes to make the Work available on an Open Access basis (and intends to pay the relevant APC), the terms of reuse of such Open Access shall be governed by a Creative Commons licence – details of these licences and which [Creative Commons](#) licence will apply to this Work are set out in our licence referred to above.

Other than as permitted in any relevant BMJ Author's Self Archiving Policies, I confirm this Work has not been accepted for publication elsewhere, is not being considered for publication elsewhere and does not duplicate material already published. I confirm all authors consent to publication of this Work and authorise the granting of this licence.

1  
2  
3 **1 Factors that influence compliance for referral from primary care to hospital for maternal and**  
4 **2 neonatal complications in Bosaso, Somalia: A Qualitative Study**  
5  
6 **3**

7 4 Catherine N Morris <sup>1</sup>, Kate Meehan <sup>2</sup>, Hussein Jama Had <sup>4</sup>, Sammy O Barasa <sup>5</sup>, Hasna Zainul <sup>2</sup>,  
8 5 Michelle Hynes <sup>2</sup>, Ribka Amsalu <sup>1,3</sup>  
9  
10 6  
11 7  
12 8

13 **9 Affiliations:**

14 10 <sup>1</sup> Department of Global Health, Save the Children, Washington, DC 20002, USA

15 11 <sup>2</sup> Division of Global Health Protection, Center for Global Health, US Centers for Disease Control  
16 12 and Prevention, Atlanta, GA. USA

17 13 <sup>3</sup> California Preterm Birth Initiative, Department of Obstetrics, Gynecology & Reproductive  
18 14 Sciences, University of California San Francisco, San Francisco, CA. USA

19 15 <sup>4</sup> Save the Children International, Mogadishu, Somalia.

20 16 <sup>5</sup> Kenya Medical Training College, Nairobi, Kenya  
21  
22  
23  
24  
25  
26  
27  
28  
29  
30  
31

19 **Address correspondence to:** Catherine N Morris. Department of Global Health, Save the  
20 Children, 899 North Capitol Street NE #900, Washington, DC 20002, USA.

21 [katiemorrismph@gmail.com](mailto:katiemorrismph@gmail.com)  
22  
23  
24

25 Word count abstract: 300

26 Word count manuscript: 5,018

27 Number of tables: 2

28 Number of Supplemental Figures: 1

29 Number of Supplemental Tables: 3

30 References: 19  
41  
42  
43  
44  
45  
46  
47  
48  
49  
50  
51  
52  
53  
54  
55  
56  
57  
58  
59  
60

1  
2  
3 1 Abstract  
4 2  
5

6 3 **Objectives:** To estimate referral compliance and examine factors that influence decisions to  
7 4 comply with referral for newborn and maternal complications in Bosaso, Somalia.

9 5 **Setting:** Bosaso, Somalia, is a large port city that hosts a large proportion of internally displaced  
10 6 persons. The study was conducted at the only four primary health centers offering 24/7 delivery  
11 7 services and the only public referral hospital in Bosaso.

12 8 **Participants:** All pregnant women who sought care at four primary centers and were referred to  
13 9 the hospital for maternal complications or mothers whose newborns were referred for neonatal  
14 10 complications were approached for enrollment from September – December 2019. In-depth  
15 11 interviews of 54 women and 14 healthcare workers were conducted.

16 12 **Outcome Measures:** This study examined timely referral compliance from the primary center to  
17 13 the hospital. In-depth interviews were analyzed for a *priori* themes investigating the decision-  
18 14 making process and experience of care for maternal and newborn referrals.

19 15 **Results:** Overall, 94% (n=51/54) of those who were referred, 39 maternal and 12 newborns,  
20 16 complied with the referral and arrived at the hospital within 24 hours. Of the three that did not  
21 17 comply, two delivered on the way, and one cited lack of money as the reason for noncompliance.  
22 18 Four themes emerged: trust in medical authority, cost of transportation and care, quality of care,  
23 19 and communications. The factors that facilitated compliance were the availability of  
24 20 transportation, family support, concern for health, and trust in medical authority. Healthcare  
25 21 workers raised the importance of considering the maternal-newborn dyad throughout the referral  
26 22 process, and the need for official standard operating procedures for referrals including  
27 23 communications between the primary care and the hospital.

28 24 **Conclusions:** High compliance for referral from primary to hospital care for maternal and  
29 25 newborn complications was observed in Bosaso, Somalia. Costs associated with transportation  
30 26 and care at the hospital need attention to motivate compliance.  
31  
32  
33  
34  
35  
36  
37  
38  
39  
40  
41  
42  
43  
44  
45  
46  
47  
48  
49  
50  
51  
52  
53  
54  
55  
56  
57  
58  
59  
60

## 1 Strengths and Limitations of this Study

- 2 • Trust of medical authority, availability of transportation, and the urgency of the medical  
3 emergency were facilitators of referral compliance, and out of pocket expenses for  
4 transportation and care at hospital were cited as barriers.
- 5 • This study presents qualitative data from a study population that included mothers,  
6 caretakers, and healthcare workers providing a diverse perspective, however, the patient  
7 sample size was small for quantitative analysis
- 8 • The study population, those who sought institutional delivery at a primary care facility,  
9 represents a small segment of the general Somali population where institutional delivery  
10 rate is 21% and this study took place in an urban setting where primary facilities were  
11 geographically near hospitals and private means of transportation were available, hence,  
12 the findings are not generalizable beyond the study population and setting.
- 13 • The investigators sought to minimize social desirability bias in the responses this through  
14 confidential interviews done outside a health facility setting, by community members  
15 who were not working at the health facility.

## 17 Introduction

18 Childbirth is the time of highest risk, when more than 40% of maternal deaths and stillbirths or  
19 neonatal deaths occur. [1] These deaths happen rapidly, and prevention requires a quick response  
20 by health care workers (HCWs) and often a referral to hospitals where comprehensive care is  
21 available. Countries affected by conflict have weakened health systems and access to quality  
22 emergency obstetric and neonatal care is limited, resulting in high maternal mortality ratios and  
23 neonatal mortality rates. [2-3] Management of obstetric complications requires skilled HCWs,  
24 specialized care such as surgery or blood transfusions, and availability of services at all times,  
25 which often is restricted to hospital levels. Inpatient hospital care is required for newborns with  
26 complications such as neonatal sepsis, complications of prematurity or low birthweight, jaundice,  
27 and respiratory distress. Timely referral from primary to hospital level care is essential to save  
28 lives of women and newborns. Most of the existing research is on maternal and newborn health  
29 referrals from home/community to primary care or from community to hospital. [4-6] There is  
30 limited literature on referral compliance and factors that influence compliance of referrals from a  
31 primary care facility to a hospital for maternal and newborn complications. However, overall  
32 delay in receiving care and challenges with transportation have been found in African studies.[7]  
33 We conducted such a study in Bosaso, Puntland, Somalia.

34 Somalia has a high maternal mortality ratio and newborn mortality rate, with 692 maternal  
35 deaths per 100,000 livebirths [7] and 38 newborn deaths per 1,000 livebirths.[8] According to the  
36 Essential Package of Health Services in Somalia, childbirth services are available at the primary  
37 care, referral health center, and hospital level. The Somali Health and Demographic Survey  
38 found that 21% of births occurred in a health facility. [8] Women of reproductive age confront  
39 several challenges to access health services, including lack of money and distance to the health  
40 facility. [8] The crisis in Somalia is characterized by armed conflict, climate shocks, and extreme  
41 poverty which have left 3 million people internally displaced and 7 million people in need of

1 humanitarian assistance as of 2022. [9] The humanitarian crises have created a shortage of  
2 skilled HCWs, low coverage of health services, and fragile health governance. Within Somalia,  
3 the health system has limited financial resources and most public facilities benefit from  
4 assistance from non-government organizations (NGOs) and United Nations (UN) agencies.[10]  
5 The health care system has four levels – health posts, primary health centers, referral health  
6 centers, and hospitals. [8, 10] Primary health centers are equipped and staffed to care for  
7 uncomplicated childbirth, essential newborn care, and newborn resuscitation, and are expected to  
8 refer anyone with complications including prolonged labor, hypertensive disorders of pregnancy,  
9 neonatal sepsis, or complications of prematurity to hospital.

10 This study is an extension of essential newborn care research that took place from 2016 to 2018  
11 at four public primary maternal child health (MCH) centers offering 24/7 delivery services in  
12 Bosaso, Somalia. [11,12] The original study demonstrated it is possible to improve availability  
13 and quality of essential newborn care services at the primary health level in humanitarian settings  
14 like Bosaso, through contextualized evidence-based newborn intervention packages. While  
15 routine newborn care was improved, there were very few small and sick newborns presenting for  
16 care at the primary level. Recognizing that small and sick newborns may require additional care  
17 at the hospital level, the researchers sought to investigate the referral process and referral  
18 compliance from the MCH center to the hospital from the perspective of HCWs and those who  
19 were referred.

## 21 **Methodology**

22 A qualitative study was undertaken to investigate referral pathways, referral compliance, and  
23 factors that influence compliance in Bosaso, Somalia.

## 24 **Study setting**

25 Bosaso, Somalia, is a large port city in the northeastern autonomous region of Puntland that hosts  
26 a large proportion of internally displaced persons. MCH centers are a type of primary health care  
27 facility staffed by midwives, nurses, and community midwives who provide both preventive and  
28 curative services focused on women and children. MCH centers provide delivery care services  
29 for uncomplicated vaginal births, and are expected to refer mothers and babies with  
30 complications that require inpatient care, assisted vaginal delivery, cesarean section, and  
31 management of other obstetric and neonatal complications. The study was conducted at four  
32 MCH centers and the only public referral hospital in the city which is run by the Ministry of  
33 Health.

## 34 **Study population**

35 The study was originally designed to enroll small or sick newborns (0 – 28 days) seeking care at  
36 the MCH, including those delivered at the MCH, who were then referred to a hospital. However,  
37 the number of newborns that were referred were very few. As a result, we expanded the study  
38 population and the study objective to include pregnant women in labor presenting to the MCH  
39 who were referred to the hospital for maternal complications.

1 All pregnant women who sought care at the MCH centers and were referred to the hospital for  
 2 maternal complications or mothers whose newborns were referred for neonatal complications  
 3 were approached for enrollment at the four selected MCH centers between September 2019 and  
 4 December 2019. Those who consented to participate in the study were enrolled at the time of  
 5 referral and contacted for an in-depth interview in their homes after completion of the referral or  
 6 within 24 hours after referral. The overall sample included 54 women; 41 women were  
 7 interviewed for maternal referral and 13 mothers and caretakers were interviewed for newborn  
 8 referral.

9 In addition, 14 HCWs who worked in the labor room or cared for newborns at the MCH centers  
 10 and at Bosaso Hospital were interviewed. Twelve were qualified midwives working at the MCH  
 11 centers, one was a clinical officer in charge of the pediatric ward, and one was a nurse in the  
 12 pediatric ward at Bosaso Hospital.

### 13 **Data collection**

14  
 15 The 15 enrollment officers and 2 interviewers involved in data collection were all females with a  
 16 health science background. They had no affiliation with the facilities where they collected data to  
 17 ensure an unbiased, neutral perspective. All were trained in research ethics, the consent process,  
 18 and interview methods over five days by two of the co-authors and a research consultant in  
 19 Bosaso. Enrollment officers were always present, 24 hours a day 7 days a week, at the four MCH  
 20 centers and Bosaso Hospital to monitor when a referral from the MCH to the hospital was issued.  
 21 Once clinical staff determined that a referral was required, the enrollment officer approached the  
 22 mother or family for consent to participate in the study. Demographic and contact information  
 23 were collected from the family at the time of enrollment. The family was contacted (either in  
 24 person or by phone) within 24 hours after discharge from the hospital to schedule an interview in  
 25 their home.

26 The in-depth interview (IDI) guides for mothers and caretakers followed a case study approach  
 27 adapted from the conceptual framework for increasing access to care for sick newborns through  
 28 community volunteer assessment and referral (Table 1, Supplemental Figure 1). [3-4, 13] After  
 29 collecting demographic and outcome information, the interviewer asked about each stage of the  
 30 referral process, beginning with the decision to seek care all the way through the referral  
 31 experience and discharge. Tools were translated from English to Somali and back translated to  
 32 ensure meaning was preserved. The tools were pilot tested in the community and revised over a  
 33 one-week period.

34 All interviews were conducted in the Somali language, audio-recorded, transcribed in Somali,  
 35 and translated into English. The IDIs lasted between 45 and 90 minutes and were conducted in  
 36 private areas to ensure confidentiality.

37 **Table 1. Data Collection Tools**

| Tool                     | Data                                                                                                                   |
|--------------------------|------------------------------------------------------------------------------------------------------------------------|
| Enrollment questionnaire | Demographic information, obstetric history, displacement status, infant information, place of birth (facility or home) |

|                                                          |                                                                                                                                                                                                                                                                                                                                                                                                                                                            |
|----------------------------------------------------------|------------------------------------------------------------------------------------------------------------------------------------------------------------------------------------------------------------------------------------------------------------------------------------------------------------------------------------------------------------------------------------------------------------------------------------------------------------|
| Maternal Child Health (MCH) Center referral log          | Referral date and hour, the reason for referral, referral completion status                                                                                                                                                                                                                                                                                                                                                                                |
| Hospital referral log                                    | Admission date and time, reasons for admission, maternal outcome, newborn outcome, length of stay at hospital, discharge / death date and hour                                                                                                                                                                                                                                                                                                             |
| In-depth interview guide: maternal and newborn referrals | Demographic information, birth history of newborn, reasons why they sought care at the MCH center, their experience receiving care at the MCH center, the decision-making process to comply or not with the referral advice by the provider, the referral process from the MCH center to the public hospital, their experience receiving care at the hospital (if the referral was completed), and any post-discharge reflections on the referral process. |
| In-depth interview guide: health care workers            | Health care worker's qualifications, providers' experience caring for small or sick newborns, referring small or sick newborns, and recommendations about the referral process                                                                                                                                                                                                                                                                             |

## Analysis

Our analytical approach was threefold. First, we conducted a descriptive analysis of the compliance rate and reasons for referral. Second, a *priori* themes based on the conceptual framework applied to the IDI guide were followed to organize and upload English translated versions of the transcripts into MAXQDA 2019 (VERBI Software, 2019) for data analysis.[14] Finally, the complete set of transcripts were read by two co-authors multiple times to identify overarching themes and draft a codebook of themes and sub-themes (Supplemental Table 1). The two co-authors coded six transcripts separately, met to discuss and revise the codebook accordingly. They then coded three transcripts separately and analyzed to ensure inter-coder agreement. Disagreements were discussed and resolved until the inter-rater reliability was in the 90<sup>th</sup> percentile range. The co-authors coded independently until saturation was reached and reviewed the remaining transcripts for outlier situations and perspectives. Thematic analysis was used to interpret the data, summarize overarching themes, and present findings in the respondents' own words.

## Patient and public involvement statement

Patients and the public were not involved in the study design. A coauthor, data collectors, and interviewers were from the community. The coauthor was engaged in the design of the study, the data collection, and the dissemination of the findings. The findings of the study have been and will continue to be shared for broader dissemination.

## Results

### Participant characteristics

The average age of the referral interview respondents was 26 years (SD =7.2), 28% were currently displaced, 57% had no formal education, 41% were not able to read, and 93% were not employed. The mean gravidity and parity in the sample were 4.3 (SD = 3.7) and 3.7 (SD = 3.2) respectively (Supplemental Table 2).

## Referral Compliance

Nearly all (94%, 51 of 54) participants, 39 of 41 maternal referrals and 12 of 13 newborn referrals, complied with a referral from the MCH center to a hospital (Supplemental Table 3). Of the three patients who did not complete the referral, two respondents gave birth on the way from the MCH center to the hospital and decided to return home with their newborns, and one decided to return straight home with her sick newborn, citing financial reasons.

The time between the referral from the MCH centers to admission at the hospital for maternal referrals averaged 4 hours and 17 minutes [range 5 minutes to 20 hours and 37 minutes], and for newborn referrals, the average time was 1 hour and 2 minutes [range 7 minutes and 2 hours and 5 minutes]. All (100%, n =51) maternal and newborn referrals who arrived at the hospital were admitted. Of the 39 women who complied with a maternal referral, 37 (95%) had a reason for hospital admission recorded in the logbook (Table 2). The mode of delivery for maternal referrals were 21 (51%) vaginal births and 20 (49%) cesarean births. There were no maternal deaths. Of the 12 newborns who completed referral from the MCH to the hospital, the reason for admission for the majority (75%) was respiratory distress.

**Table 2. Reasons\* for admission at Bosaso hospital for maternal and newborn referrals**

|                                                                  | n           | %   |
|------------------------------------------------------------------|-------------|-----|
| <b>Maternal Referrals</b>                                        | <b>N=39</b> |     |
| Obstructed / prolonged labor                                     | 13          | 35% |
| Previous cesarean                                                | 8           | 22% |
| Anemia                                                           | 7           | 19% |
| Hypertension                                                     | 4           | 11% |
| Bleeding                                                         | 2           | 5%  |
| Pre-eclampsia                                                    | 2           | 5%  |
| Other (Hypoxia, placenta previa, post-term, transverse position) | 4           | 11% |
| Missing reason for admission                                     | 2           |     |
| <b>Newborn Referrals</b>                                         | <b>N=12</b> |     |
| Respiratory distress                                             | 9           | 75% |
| Hypoglycemia                                                     | 2           | 17% |
| Infection                                                        | 1           | 8%  |
| Trouble feeding (Feeding problem)                                | 1           | 8%  |
| *Multiple reasons for admission could be recorded                |             |     |

For pregnant women who were referred and admitted to the hospital, the average length of stay was 4.4 days (range <1 day to 9 days) and 4.7 days (range 1 to 7 days) for a vaginal birth and cesarean delivery, respectively. For newborns who were referred to the hospital, the average length of stay was 3.45 days (range 1 to 13 days).

## Themes

1  
2  
3 1 Four themes emerged from the qualitative analysis, which included (a) trust in medical authority  
4 2 (b) cost of transportation and care at the hospital (c) quality of care, and (d) communications.

5  
6 3 *Trust in medical authority*

7  
8 4 The decision for the pregnant woman or caregiver to seek care at an MCH center was made at  
9 5 the start of labor, due to a complication with labor, or due to recognition that their newborn was  
10 6 sick (recognized symptoms included difficulty breastfeeding, vomiting, and fever).

11  
12 7 For women who chose to visit the MCH center for delivery, they described the MCH center as  
13 8 clean, trustworthy, and reliable, they felt comfortable with the staff there. Many referenced  
14 9 proximity and the availability of cost-free health services. Some relied on recommendations from  
15 10 family, friends, or neighbors.

16  
17  
18 11 *“The midwives were with us day and night, and the [girls] were available within*  
19 12 *minutes. It is a good place. A clean place. Your blood is continuously measured, you*  
20 13 *are being visited regularly and asked about your condition. It was a very well-*  
21 14 *organized place.” -Mother of a newborn who was referred, Age 23*

22 15  
23  
24 16 Many respondents mentioned how concern for their own health, or the health of their newborn,  
25 17 led them to complete the referral to the hospital. Respondents also mentioned trusting the  
26 18 medical authority at the MCH centers who advised that the referral was necessary.

27  
28 19 *“They took the decision immediately because they appreciated the judgment of the health*  
29 20 *staff, and they took her to the hospital immediately.” -Woman who was referred, Age 21*

30  
31 21 *Cost of transportation and care at the hospital*

32  
33 22 Most respondents took a taxi or borrowed a car to reach the MCH center, though some women  
34 23 went on foot if they were unable to get transportation. Time to reach the MCH took ten minutes  
35 24 to two hours on foot, or 20 - 60 minutes by car. Women mentioned the cost of transportation as a  
36 25 challenge, and many had to source the funds from others to hire a taxi.

37  
38 26 While almost all the respondents complied with the referral from the MCH to the hospital in a  
39 27 timely manner, they described the challenges they overcame to do so and the factors that  
40 28 weighed into their decision. The most mentioned challenge was finances. Respondents described  
41 29 costs associated with transportation, hospital admission, and treatment. Many families stated that  
42 30 they did not have the money readily available to cover anticipated costs.

43  
44 31 Both HCWs and community respondents brought up the need for a reliable ambulance or free  
45 32 transportation to facilitate referral cases. Transportation availability was also closely linked to  
46 33 finances, as the referral pathway relied on private transport (mostly taxi services) between the  
47 34 MCH center and the hospital. They mentioned that private cars and taxis were not always  
48 35 available or accessible when needed, and the cost could be prohibitive for some families.

49  
50 36 For those who complied with the referral, in some cases, finances limited families from  
51 37 completing care at the hospital. The high cost of care and treatment at the hospital was

1 consistently mentioned, particularly in contrast with the MCH centers, where all treatment and  
2 many medications were provided free of charge.

3 *“I was worried about the costs at the hospital. There was a time when we had to leave  
4 the hospital due to finances and go back home. After we found the money, we went back  
5 to the hospital.”* -Mother of a newborn who was referred, Age 19

6 Families were asked to pay some costs upfront, which delayed care when the family had  
7 to source the necessary money. Respondents explained that their family members were  
8 required to purchase certain medications and supplies from the hospital pharmacy or  
9 somewhere outside the compound. Purchasing medicine and supplies was another  
10 financial burden. Some women were surprised at the high cost of surgery, medications, or  
11 other medical interventions and mentioned that cost could be a barrier to staying at the  
12 hospital.

13 *“Yes, I very much needed financial help for the services extended to me... the blood  
14 transfusions were costing money, which I thought were free. The blood was donated by  
15 my family and my husband. It cost us \$150 total, but we had to stay one more night [to  
16 find the money] before being discharged”* -Woman who was referred, Age 36

17 *“The color of the baby was blue when he was born. They took him to a separate room  
18 since the baby required oxygen and tube feeding. They measured the blood sugar of the  
19 baby very frequently. The baby become well at the 5<sup>th</sup> day but still needed hospital  
20 admission, but we couldn't afford to stay and took him to home.”* -Woman who was  
21 referred, Age 35

22 While challenges to sourcing timely financial support were described in depth, most women  
23 were able to find monetary support from family, neighbors, HCWs, and NGOs.

24 *“[During the referral] my husband's sisters were taking care of the child and keeping the  
25 house, and if somebody is sick, the money is nothing, you can get money, but you can't  
26 get health. If a person is bedridden, money will come, it's compulsory, even if you don't  
27 have it yourself.”* -Mother of a newborn who was referred, Age 26

### 28 *Quality of care*

29 After arriving at the MCH center in labor, respondents described receiving a vaginal exam and  
30 having their blood pressure taken. After the initial assessment and monitoring of labor, some  
31 respondents were sent away and told to return when their labor had progressed. One respondent  
32 gave birth on the road on her way home after being told by the MCH staff to return later.

33 Many women who went to the MCH while in labor praised the HCWs at the MCH for  
34 immediate, attentive care. A few respondents expressed concern that the MCH was too quick to  
35 refer without proper assessments, particularly if they arrived at the MCH during the night.

36 *“They didn't give me good care because the staff changed each shift. There was  
37 an old lady during the night, and she was not active compared to the others in the  
38  
39*

1  
2  
3 1 *day. In the morning there were active girls. They were measuring the blood*  
4 2 *pressure and did some blood analysis.” -Woman who was referred, Age 23*  
5 3

6 4  
7 4 Several respondents expressed concern about seeking care at the referral hospital due to fear of  
8 5 medical procedures, like Caesarean section or blood transfusions, or perceived quality of care  
9 6 available at the hospital. While they expressed these fears during the interview, it did not prevent  
10 7 any of the respondents from completing the referral.  
11 8

12 9  
13 9 At the hospital, respondents who were referred during labor were attended to immediately. Most  
14 10 respondents stated that they were able to receive care soon after arrival at the hospital, or as soon  
15 11 as their condition was deemed as critical. Upon arrival, the hospital staff assessed, treated, and  
16 12 monitored the mother and newborn throughout the labor and delivery process.

17 13  
18 13 *“When I reached the entrance of the hospital I got out of the car and I walked, although*  
19 14 *it was so difficult to me. Then we saw a nurse and my husband gave her our paper and*  
20 15 *she immediately call the hospital manager and they prepared me for surgery. Then they*  
21 16 *began the surgery, and when I gave birth, they administered oxygen to the baby. My mom*  
22 17 *looked after the baby and my husband looking after me until my conscious become*  
23 18 *normal.” -Woman who was referred, Age 33*

24 19  
25 19 In a few instances, care was delayed by HCWs’ breaks (late at night, prayer times, and around  
26 20 lunch hour) or by specialist availability, such as for ultrasound.

27 21  
28 21 The respondents’ descriptions of care received by their newborns varied depending on the needs  
29 22 of the newborn. Most newborns referred to the hospital were immediately placed on oxygen,  
30 23 received nasogastric-feeding tubes, and/or were treated for hypoglycemia.

31 24  
32 24 *“Yes. The bed rent was free. The place was clean. The child was taken care of. They*  
33 25 *were telling us to take care of the child and feed it. The child was continuously*  
34 26 *monitored. You will be awakened at night.” -Mother of newborn who was referred,*  
35 27 *Age 21*

36 28  
37 29 *“However, I would suggest that the hospital staff need to help the sick and poor*  
38 30 *people. They should continuously follow up with their patients, not just come once and*  
39 31 *not come back. Anything can happen to a sick person at any minute.” -Mother of a*  
40 32 *newborn who was referred, Age 23*

41 33  
42 33 When interviewed about their baby’s health post-discharge, most respondents stated that their  
43 34 child’s condition was improved. A few respondents mentioned that they felt their newborns were  
44 35 discharged while they were still unwell, which led to seeking care at different facilities or  
45 36 alternative practitioners. A few women reported returning home from the hospital still feeling ill  
46 37 themselves. Overall, most respondents stated that the quality of care at the hospital was good,  
47 38 though costly.

48 39  
49 40 *Communications*

1  
2  
3  
4 1  
5 2 Most respondents were able to explain why they were referred from the MCH center to the  
6 3 Hospital. For newborns that were referred, many respondents described the reason for referral as  
7 4 related directly to supplies or medications that were not available at the MCH center at the time  
8 5 of care, specifically oxygen, fever medications, and blood tests.  
9 6

10 7  
11 8 *“I didn’t ask them his weight when he was born, and after a week, I took him to  
12 9 get vaccination. He started to vomit, and they said he need to get diagnosed in  
13 10 order to give him medicine, and they couldn’t provide it and referred him to the  
14 11 hospital.”* -Mother of a newborn who was referred, Age 33

15 12  
16 12 Those born at the hospital with complications were immediately taken to a separate room for  
17 13 treatment. When newborns had to be separated from their mothers, there was often  
18 14 miscommunication between the caretakers and HCWs about the treatment required and the  
19 15 prognosis of the newborn.  
20 16

21 17  
22 17 Specific to communication for the referral process, multiple HCWs suggested creating official,  
23 18 supported channels of communication and accountability between the MCH and the hospital.  
24 19 The suggestions included official referral slips and communication channels to inform each other  
25 20 of referrals, outcomes, and follow-ups.  
26 21

27 22  
28 22 *“We counsel them as much as we can and we sometimes pay for the taxi costs. We  
29 23 sometimes give them the ambulance and if the ambulance is not available, then  
30 24 we give them money from our pockets. We convince the family who are with the  
31 25 mother to take care of the [other] children at home. We tell them the child is at  
32 26 risk of dying and the mother should do as much as she can to save [the child], but  
33 27 if the child is taken home, nothing can be done for it.”* -MCH HCW  
34 28  
35 28

### 29 **Health Care Worker (HCW) perspective on newborn referral**

36 29  
37 30 To elicit more context on referrals within the Bosaso health system, HCWs were interviewed for  
38 31 their perspectives on newborn referrals. The HCWs at the MCH centers all mentioned a low  
39 32 number of small or sick newborns that seek care at the MCH.  
40 32  
41 33

42 33  
43 34 *“It [cases of small or sick newborns] is not many. They are brought to you in such  
44 35 condition, but often the ones that are delivered here are more. Now I remember  
45 36 two cases in the whole of last year.”* -MCH HCW  
46 36

47 37  
48 38 At the hospital, contrary to the MCH centers, the HCWs described a high caseload of sick  
49 39 newborns and infants. Low birthweight was cited as a common reason to admit newborns to the  
50 40 hospital, and in such cases, the HCWs provided nasogastric feeding, breastfeeding support, and  
51 41 kangaroo mother care. HCWs mentioned that many of the severe cases are born in the  
52 42 community and have a long distance to travel to seek care at the hospital, and therefore have  
53 43 worse outcomes. At both the MCH and hospital, HCWs identified specialized staff, training, and  
54 43 equipment as areas that need to be improved.  
55  
56  
57  
58  
59  
60

1  
2  
3 1 *“Yes, the equipment's is available but has no usage. And the usage requires*  
4 2 *training so that is the challenging case ... it can be managed if there is no difficult*  
5 3 *condition. But the premature requires an incubator and the incubator is locked in*  
6 4 *a room and we don't have the training, but we have the skills and techniques to*  
7 5 *work.” -Hospital HCW*  
8  
9

10 6 The MCH staff were not in communication with the hospital to know whether the hospital had  
11 7 enough beds to admit small and sick newborns, nor to alert the hospital that they were sending  
12 8 patients for admission. Additionally, no official documentation was required for referrals of  
13 9 mothers or newborns. If medications were provided, HCWs might write on a blank piece of  
14 10 paper describing the medications given for the patient to take to the hospital. Transportation from  
15 11 the MCH to the hospital was usually by private car or taxi organized by the patient's family. If  
16 12 the referral patient was in critical condition, a HCW would accompany the patient to the hospital,  
17 13 if possible.  
18  
19  
20

## 21 15 **Discussion**

22 16 Our study found a high rate (94%) of maternal and newborn referral compliance between MCH  
23 17 centers and the public hospital in Bosaso, Somalia. The urban location, proximity between MCH  
24 18 centers and hospitals, availability of transportation, and familial support were facilitators for the  
25 19 high compliance. Respondents attributed their concern for health (their own and their newborn's)  
26 20 and trust in medical authority as primary reasons they completed the referral in a timely manner.  
27 21 Our study also found that most referred patients were admitted and received care soon after  
28 22 arrival. One respondent who was unable to complete the referral cited the financial barrier as the  
29 23 primary reason not to go to the hospital.  
30  
31

32 24 The compliance rate in our study was higher than the compliance rates for referrals from the  
33 25 community level found in other studies in African countries. [4,13] This could be due to the  
34 26 location, the source of referral (facility-based staff instead of community health workers), and  
35 27 the respondent population. Our study participants had demonstrated health care utilization  
36 28 behavior and trusting relationships with providers by already seeking care at the MCH center.  
37 29 Trust in medical authority was described as their main reason for complying with the referral,  
38 30 this is informed by previous personal experience, or family and friends' experiences, on  
39 31 receiving care at the MCH centers. A critical element of a successful referral pathway is a  
40 32 trusting relationship between patient and providers, which requires clear communication on the  
41 33 reasons for the referral and the urgency. [15] When communicated, the concern for the mother-  
42 34 baby wellbeing was a facilitating factor for referral compliance. Two of the three who did not  
43 35 complete the referral did not arrive at the hospital after giving birth on the road as they felt the  
44 36 reasons for referral (prolonged labor and multiparity) were not relevant anymore.  
45  
46  
47  
48

49 37 Distance, cost, and quality of care are often cited as factors for delayed care seeking for maternal  
50 38 health. [16, 17] In our study, most complied with referrals immediately and received care on  
51 39 arrival at the hospital. Our study findings were consistent with the literature in that cost was cited  
52 40 as a barrier for transportation to the appropriate level of care. While most respondents were able  
53 41 to complete the referral, almost all mentioned the financial stress it put on their families to source  
54  
55  
56  
57  
58  
59  
60

1  
2  
3 1 the money for transportation, hospital care, and medications. Our respondents were able to  
4 2 access financial support from extended family, community members, NGOs, and UNHCR.

6 3 In theory, the referral initiating health facility should inform the receiving health facility, for  
7 4 them to anticipate the patient's medical need and expect their arrival. Similarly, feedback from  
8 5 the receiving health facility back to the referring center will facilitate any follow-up need of the  
9 6 patient and to inform future referrals.[18] In our study setting, there were no formal  
10 7 communications (phone or paper) between the MCH centers and Bosaso Hospital, and this was  
11 8 identified as a key area for improvement by both the HCWs and patients who were referred. This  
12 9 lack of communication between referring and receiving health facilities has been reported as a  
13 10 reason for referral decline or delay in receiving care. [18] While most respondents noted that  
14 11 they were admitted and received timely (within an hour) initiation of care at the hospital, there  
15 12 were respondents that reported delays at the hospital due to staff capacity or staff breaktime.  
16 13 Mobile phones provided by the health system have been used effectively in other settings to  
17 14 increase communications between referring and receiving health facilities. [18]

21 15 When considering programmatic interventions to improve newborn health through referral  
22 16 pathways, the maternal-newborn dyad must be considered in fragile settings like Bosaso,  
23 17 Somalia. Our study showed that HCWs at the primary level were quick to refer complicated  
24 18 deliveries to the hospital level while the mother was still in labor could have contributed to a  
25 19 better birth outcome and maternal survival. In a review of neonatal referrals in Vietnam  
26 20 researchers found that those who self-referred had lower case fatality rate than those referred  
27 21 from provincial hospitals (3.4% versus 21.3%) and attribute the difference to be delay in  
28 22 initiation of appropriate treatment. [19] In our study the MCH was often not used by families for  
29 23 neonatal complications as they preferred to go directly to hospital. While the HCWs respondents  
30 24 employed at the MCH could discuss in detail how they would stabilize and treat small or sick  
31 25 newborns, in practice, they referred immediately to the hospital without stabilization  
32 26 interventions for those born at the health facility. The content and quality of pre-referral care in  
33 27 newborn health is an area that needs further investigation.[18] In addition, future research ought  
34 28 to consider the evaluation of safety of the referral process including medical care provided  
35 29 during transportation.

### 41 30 **Study strengths and limitations**

42 31  
43 32 Our study findings are not generalizable to Bosaso or Somalia. First, given that the institutional  
44 33 delivery rate in Somalia is estimated at around 21%, this study population represents a small  
45 34 segment of the general Somali population.[7] Second, the experiences of our study population  
46 35 might be different from the general population on several counts, including the ability to  
47 36 overcome financial challenges in transportation and care at the hospital. Third, our study sites are  
48 37 not reflective of access to hospital care in Somalia in that it is an urban setting, the hospital was  
49 38 near the MCH centers, and the availability of means for transportation in the form of taxicabs  
50 39 that one can call through a mobile phone. Our sample size was also small and has high margin of  
51 40 uncertainty in terms of referral compliance rate.  
52 41

1  
2  
3 1 There is a possibility of social desirability bias in the responses. That said, the fact that the  
4 2 interview was confidential, done outside a health facility, by community members who weren't  
5 3 at the time working at the health facility would have minimized the bias.

6 4  
7 5 The strength of the study was the qualitative study, the ability to examine factors that affect the  
8 6 decision at all levels for both mother-baby dyad, and our ability to collect perspectives from  
9 7 HCWs. Timing and language used for the interview was a strength in that we waited for the  
10 8 mother-baby dyad to return to their home (not in the middle of a medical crisis), Somali  
11 9 language were used for the interview, and native speakers from the community conducted the  
12 10 interview.

## 13 11 14 12 **Conclusion**

15 13 This study found high rates of compliance with referrals from the primary to secondary levels for  
16 14 maternal and newborn referrals. Proximity, concern for health, and trust in medical authority  
17 15 were cited as contributing factors for referral compliance. Cost was the main barrier that  
18 16 impacted the respondents' decisions to seek care and comply with referral and care in this study.

19 17 The HCWs at the MCH centers identified most complications during labor and immediately  
20 18 referred from the MCH center to the hospital. This emphasizes the importance of the maternal-  
21 19 newborn dyad in places like Bosaso, Somalia, and the need for high-quality intrapartum care  
22 20 availability that considers the needs of both the mother and newborn. Without specialized  
23 21 certifications or designated roles, delivery attendants must have the knowledge, skills, and  
24 22 equipment to attend to both the mother and newborn during delivery. Midwives staffing the  
25 23 MCH centers must be able to recognize potential complications and stabilize the patient while  
26 24 arranging transportation to the hospital.

27 25 Our findings illustrate that high compliance can be achieved if circumstances are conducive.  
28 26 Assistance with cost and transportation and improvements to the quality of care and referral  
29 27 processes would help in making referrals to necessary, hospital-level care is more accessible and  
30 28 inclusive in Bosaso.

## 31 29 32 30 **Acknowledgments**

33 31 We would like to thank the women and their family members who consented, participated, and  
34 32 shared their experiences. We are grateful to Save the Children International's Somalia country  
35 33 office, the Puntland, Somalia Ministry of Health, the Bosaso MCH center, and hospital health  
36 34 team who were critical in providing us the approval, logistics, and advice. This project would not  
37 35 have been possible without the supervision and interview skills of Warsan Osman Salah and Kiin  
38 36 Jamac Farax, who worked tirelessly to enroll participants, schedule interviews, and conduct  
39 37 interviews. Additional thanks to Kate Lopes for supporting the data collection training and kick-  
40 38 off.

## 41 39 **Contributors**

42 40 CM drafted the initial manuscript, reviewed and revised the manuscript. CM and KM conducted  
43 41 data analysis. RA, HH, SB, CM, KM, and MH, contributed to study methodology, development

1  
2  
3 1 of tools, data analysis, reviewed and revised the manuscript. ZH reviewed and revised the  
4 2 manuscript. HH and SB trained data collectors, interviewers and contributed to data quality.

5  
6 3 All authors approved the final manuscript as submitted and agree to be accountable for all  
7 4 aspects of the work  
8

9 5

## 10 6 **Funding**

11  
12  
13 7 Funding was provided through a cooperative agreement with the Centers for Disease Control and  
14 8 Prevention (Grant U01GH001657). CDC staff contributed to the study design, analysis and  
15 9 interpretation of results, and review and approval of the manuscript.

16  
17  
18 10 RA was supported by a University of California San Francisco, Preterm Birth Initiative  
19 11 transdisciplinary post-doctoral fellowship, funded by Marc and Lynne Benioff and a T32 training  
20 12 grant (1T32HD098057) from the National Institute of Child Health and Human Development  
21 13 (NICHD) entitled ‘Transdisciplinary Research Training to Reduce Disparities in Preterm Birth  
22 14 and Improve Maternal and Neonatal Outcomes’. The donor was not involved in the design,  
23 15 execution or analysis of the study.

## 24 16 **Competing interests**

25  
26  
27 17 None declared  
28

## 29 18 **Patient and public involvement**

30  
31 19 Patients and/or the public were involved in the design, or conduct, or reporting, or dissemination  
32 20 plans of this research. Refer to the Methods section for further analysis.  
33

34 21

## 35 22 **Patient consent for publication**

36  
37 23 Verbal consent obtained  
38

## 39 24 **Ethics approval**

40 25 Approval for this study was obtained from the Puntland, Somalia Ministry of Health, the Save  
41 26 the Children ethics review committee, and a nonresearch determination by the US Centers for  
42 27 Disease Control and Prevention (CGH HSR Tracking #: 2016-0119). Verbal consent was  
43 28 obtained from women, caretakers, and health care workers. Personal identifiers collected to  
44 29 facilitate interview were destroyed immediately after completion of the data collection process.  
45 30 No identifying information was recorded in the transcripts. Transcripts were only available to the  
46 31 research staff.  
47  
48  
49

## 50 32 **Data availability statement**

51 33 The excerpts of the transcripts relevant to the study have been shared in the manuscript. There is  
52 34 no additional data available.  
53  
54  
55  
56  
57  
58  
59  
60

1  
2  
3  
4  
5  
6  
7  
8  
9  
10  
11  
12  
13  
14  
15  
16  
17  
18  
19  
20  
21  
22  
23  
24  
25  
26  
27  
28  
29  
30  
31  
32  
33  
34  
35  
36  
37  
38  
39  
40  
41  
42  
43  
44  
45  
46  
47  
48  
49  
50  
51  
52  
53  
54  
55  
56  
57  
58  
59  
60

1 Disclaimer: The findings and conclusions in this report are those of the authors and do not  
2 necessarily reflect the official policy or position of the U.S. Centers for Disease Control and  
3 Prevention, nor the United States Government.

For peer review only

## 1 References

- 2 1. Lawn JE, Blencowe H, Oza S, et al. Every Newborn: progress, priorities, and potential  
3 beyond survival [published correction appears in *Lancet*. 2014 Jul  
4 12;384(9938):132]. *Lancet*. 2014;384(9938):189-205. doi:10.1016/S0140-6736(14)60496-7
- 5 2. Bendavid E, Boerma T, Akseer N, et al. The effects of armed conflict on the health of  
6 women and children. *Lancet*. 2021;397(10273):522-532. doi:10.1016/S0140-  
7 6736(21)00131-8
- 8 3. Akseer N, Wright J, Tasic H, et al. Women, children and adolescents in conflict countries:  
9 an assessment of inequalities in intervention coverage and survival. *BMJ Glob Health*.  
10 2020;5(1):e002214. Published 2020 Jan 26. doi:10.1136/bmjgh-2019-002214
- 11 4. Herbert HK, Lee AC, Chandran A, Rudan I, Baqui AH. Care seeking for neonatal illness in  
12 low- and middle-income countries: a systematic review. *PLoS Med*. 2012;9(3):e1001183.  
13 doi:10.1371/journal.pmed.1001183
- 14 5. Kozuki N, Guenther T, Vaz L, et al. A systematic review of community-to-facility neonatal  
15 referral completion rates in Africa and Asia. *BMC Public Health*. 2015;15:989. Published  
16 2015 Sep 30. doi:10.1186/s12889-015-2330-0
- 17 6. Manu A, Hill Z, Ten Asbroek AH, et al. Increasing access to care for sick newborns:  
18 evidence from the Ghana Newhints cluster-randomised controlled trial. *BMJ Open*.  
19 2016;6(6):e008107. Published 2016 Jun 13. doi:10.1136/bmjopen-2015-008107
- 20 7. Waiswa P, Kallander K, Peterson S, Tomson G, Pariyo GW. Using the three delays model  
21 to understand why newborn babies die in eastern Uganda. *Trop Med Int Health*.  
22 2010;15(8):964-972. doi:10.1111/j.1365-3156.2010.02557.x
- 23 8. Directorate of National Statistics, Federal Government of Somalia. The Somali Health and  
24 Demographic Survey 2020. Available at [https://somalia.unfpa.org/sites/default/files/pub-  
25 pdf/FINAL%20SHDS%20Report%202020\\_V7\\_0.pdf](https://somalia.unfpa.org/sites/default/files/pub-pdf/FINAL%20SHDS%20Report%202020_V7_0.pdf). Accessed on September 2<sup>nd</sup>, 2022
- 26 9. United Nations Office for Coordination of Humanitarian Affairs. Available at  
27 <https://www.unocha.org/somalia/about-ocha-somalia> Accessed on Sept 2<sup>nd</sup>, 2022
- 28 10. Ahmed Z, Atallahjan A, Gaffey MF, et al. Understanding the factors affecting the  
29 humanitarian health and nutrition response for women and children in Somalia since 2000:  
30 a case study. *Confl Health*. 2020;14:35. Published 2020 May 27. doi:10.1186/s13031-019-  
31 0241-x
- 32 11. Amsalu R, Morris CN, Chukwumalu K, et al. Essential newborn care practice at four  
33 primary health facilities in conflict affected areas of Bossaso, Somalia: a cross-sectional  
34 study. *Confl Health*. 2019;13:27. Published 2019 Jun 13. doi:10.1186/s13031-019-0202-4
- 35 12. Amsalu R, Morris CN, Hynes M, et al. Effectiveness of clinical training on improving  
36 essential newborn care practices in Bossaso, Somalia: a pre and postintervention  
37 study. *BMC Pediatr*. 2020;20(1):215. Published 2020 May 13. doi:10.1186/s12887-020-  
38 02120-x
- 39 13. Ansah Manu A, ten Asbroek A, Soremekun S, Gyan T, Weobong B, Tawiah-Agyemang C,  
40 Danso S, Amenga-Etego S, Owusu-Agyei S, Hill Z, Kirkwood BR. Evaluating the  
41 implementation of community volunteer assessment and referral of sick babies: lessons  
42 learned from the Ghana Newhints home visits cluster randomized controlled trial. *Health*

- 1  
2  
3 1 Policy Plan. 2014 Sep;29 Suppl 2(Suppl 2):ii114-27. doi: 10.1093/heapol/czu080. PMID:  
4 2 25274636; PMCID: PMC4202912.  
5 3  
6 3 14. VERBI Software. (2021). MAXQDA 2022 [computer software]. Berlin, Germany: VERBI  
7 4 Software. Available from maxqda.com  
8 5 15. Nalwadda CK, Waiswa P, Kiguli J, et al. High compliance with newborn community-to-  
9 6 facility referral in eastern Uganda: an opportunity to improve newborn survival. *PLoS One*.  
10 7 2013;8(11):e81610. Published 2013 Nov 29. doi:10.1371/journal.pone.0081610  
11 8  
12 8 16. Pembe AB, Mbekenga CK, Olsson P, Darj E. Why do women not adhere to advice on  
13 9 maternal referral in rural Tanzania? Narratives of women and their family members. *Glob*  
14 10 *Health Action*. 2017;10(1):1364888. doi:10.1080/16549716.2017.1364888  
15 11  
16 11 17. Thaddeus S, Maine D. Too far to walk: maternal mortality in context. *Soc Sci Med*.  
17 12 1994;38(8):1091-1110. doi:10.1016/0277-9536(94)90226-7  
18 13  
19 14 18. Avoka CK, McArthur E, Banke-Thomas A. Interventions to improve obstetric emergency  
20 15 referral decision making, communication and feedback between health facilities in sub-  
21 16 Saharan Africa: A systematic review. *Trop Med Int Health*. 2022;27(5):494-509.  
22 17 doi:10.1111/tmi.13747  
23 18  
24 18 19. Miles M, Dung KT, Ha LT, et al. The cause-specific morbidity and mortality, and referral  
25 19 patterns of all neonates admitted to a tertiary referral hospital in the northern provinces of  
26 20 Vietnam over a one year period. *PLoS One*. 2017;12(3):e0173407. Published 2017 Mar 10.  
27 21 doi:10.1371/journal.pone.0173407  
28  
29  
30  
31  
32  
33  
34  
35  
36  
37  
38  
39  
40  
41  
42  
43  
44  
45  
46  
47  
48  
49  
50  
51  
52  
53  
54  
55  
56  
57  
58  
59  
60

## 1 Supplemental Reference Tables

2  
3 Supplemental Table 1: Codebook

| Codebook                                                    |                                                                 |
|-------------------------------------------------------------|-----------------------------------------------------------------|
| Parent Code                                                 | Sub-code                                                        |
| The Decision to Seek Care                                   | Reasons for Initially Seeking Care                              |
|                                                             | Recognizing Newborn Danger Signs                                |
|                                                             | Reasons for choosing initial care facility                      |
|                                                             | Process to seek initial Care                                    |
| Care and Referral at the Maternal Child Health Center (MCH) | Care for Mother received at Maternal Child Health Centers       |
|                                                             | Care for Newborn received at MCH                                |
|                                                             | Supplies and Medications at MCH                                 |
|                                                             | Opinions about Quality of Care received at MCH                  |
|                                                             | Reasons for Referral                                            |
|                                                             | Advice from Healthcare Workers                                  |
|                                                             | Referral Documentation                                          |
| The Referral Decision                                       | Factors: Finances                                               |
|                                                             | Factors: Concern for Health                                     |
|                                                             | Factors: Transportation                                         |
|                                                             | Factors: Trust in Medical Authority                             |
|                                                             | Factors: Religious / Socio-cultural Influences                  |
|                                                             | Factors: Concerns about medical procedures at referral facility |
|                                                             | Factors: Belief about quality of care at referral facility      |
|                                                             | Factors: Concern about home responsibilities                    |
|                                                             | Factors: Familial Influences                                    |
| The Referral Process                                        | Patient Experience of Referral                                  |
|                                                             | Referral Procedures                                             |
|                                                             | Referral Companions                                             |
| Care at the Referral Hospital                               | Care for Mother received at Hospital                            |
|                                                             | Care for Newborn received at Hospital                           |
|                                                             | Supplies and Medications at the Hospital                        |
|                                                             | Opinions about Quality of Care received at Hospital             |
|                                                             | Compliance with Treatment Plan                                  |
|                                                             | Post Discharge Health Issues                                    |
| Recommendations for Improvement                             | Community Education and Awareness                               |
|                                                             | Transportation                                                  |
|                                                             | Subsidized / Free care at the Hospital                          |
|                                                             | Training for Healthcare Workers                                 |
|                                                             | Supplies and Equipment at MCH and Hospital                      |
|                                                             | Referral Processes                                              |
|                                                             | Quality of Care at Hospital                                     |
| Formal connection of MCHs and Hospital                      |                                                                 |

4 MCH = Maternal Child Health Center

1 **Supplemental Figure 1. Referral Pathway Conceptual Framework**



2  
3  
4

review only

## 1 Supplemental Table 2: Demographics of Study Participants

| Respondent Demographics                  |                               | N= 54 | SD  |
|------------------------------------------|-------------------------------|-------|-----|
| Age                                      | Average Age                   | 26    | 7.1 |
| Gravidity                                | Average Number of Pregnancies | 4.3   | 3.7 |
| Livebirths                               | Average Livebirths            | 3.7   | 3.2 |
| Average Current Number of Children Alive |                               | 3.5   | 3.2 |
| Respondent Demographics                  |                               | N= 54 | %   |
| Displacement Status                      | Yes                           | 15    | 28% |
|                                          | No                            | 38    | 70% |
|                                          | No Response                   | 1     | 2%  |
| Occupation of Mother                     | Government                    | 1     | 2%  |
|                                          | Small Business                | 1     | 2%  |
|                                          | Other                         | 2     | 4%  |
|                                          | Not Employed                  | 50    | 93% |
| Occupation of Father                     | Agriculture                   | 2     | 4%  |
|                                          | Fishing                       | 2     | 4%  |
|                                          | Government                    | 3     | 6%  |
|                                          | Small Business                | 5     | 9%  |
|                                          | Other                         | 29    | 54% |
|                                          | Not Employed                  | 7     | 13% |
|                                          | No Response                   | 6     | 11% |
| Education of Mother                      | No Formal Education           | 31    | 57% |
|                                          | Primary                       | 14    | 26% |
|                                          | Secondary                     | 5     | 9%  |
|                                          | Associates                    | 1     | 2%  |
|                                          | Bachelor                      | 2     | 4%  |
|                                          | No Response                   | 1     | 2%  |
| Education of Father                      | No Formal Education           | 21    | 39% |
|                                          | Primary                       | 12    | 22% |
|                                          | Secondary                     | 7     | 13% |
|                                          | Associates                    | 0     | 0%  |
|                                          | Bachelor                      | 6     | 11% |
|                                          | Masters or Higher             | 2     | 4%  |
|                                          | No Response                   | 6     | 11% |
| Literacy                                 | Yes                           | 28    | 52% |
|                                          | No                            | 22    | 41% |
|                                          | No Response                   | 4     | 7%  |

2  
3  
4

1  
2  
3  
4  
5  
6  
7  
8  
9  
10  
11  
12  
13  
14  
15  
16  
17  
18  
19  
20  
21  
22  
23  
24  
25  
26  
27  
28  
29  
30  
31  
32  
33  
34  
35  
36  
37  
38  
39  
40  
41  
42  
43  
44  
45  
46  
47  
48  
49  
50  
51  
52  
53  
54  
55  
56  
57  
58  
59  
60

**1 Supplemental Table 3: Referral Outcomes**

For peer review only

| <b>Referral Compliance (went to hospital within 24 hours) N=54:</b> |              |    |     |                                                                                                                                              |
|---------------------------------------------------------------------|--------------|----|-----|----------------------------------------------------------------------------------------------------------------------------------------------|
| Maternal Referrals                                                  | Compliant    | 39 | 95% | NOTE: 2 chose to go to a private hospital instead of Bosaso hospital, but went within 24 hours                                               |
|                                                                     | Noncompliant | 2  | 5%  | NOTE: In both cases, the mother delivered on her way from the MCH to the hospital and decided to return home instead of continue to hospital |
| Newborn Referrals                                                   | Compliant    | 12 | 92% |                                                                                                                                              |
|                                                                     | Noncompliant | 1  | 8%  | NOTE: cited financial reasons                                                                                                                |
| Combined                                                            | Compliant    | 51 | 94% |                                                                                                                                              |
|                                                                     | Noncompliant | 3  | 6%  | *Note 1 cited finances, 2 delivered enroute & returned home                                                                                  |

| <b>Referral Time (between MCH referral and admission to Hospital)</b> |                        |              |  |
|-----------------------------------------------------------------------|------------------------|--------------|--|
| Maternal Referrals                                                    | Average length of time | 4hr 17 min   |  |
|                                                                       | Shortest Referral Time | 5 min        |  |
|                                                                       | Longest Referral Time  | 20 hr 37 min |  |
| Newborn Referrals                                                     | Average length of time | %            |  |
|                                                                       | Shortest Referral Time | 7 min        |  |
|                                                                       | Longest Referral Time  | 2 hr 5 min   |  |

| <b>Type of Delivery, n = 41</b> |                  |    |     |
|---------------------------------|------------------|----|-----|
| Maternal Referral               | Cesarean         | 20 | 49% |
|                                 | Vaginal Delivery | 21 | 51% |

| <b>Newborn Outcome (at Hospital), n =43</b>  |                             |    |     |                                                        |
|----------------------------------------------|-----------------------------|----|-----|--------------------------------------------------------|
| Maternal Referrals                           | Alive and Healthy           | 21 | 49% | Includes 1 set of healthy twins                        |
|                                              | Alive but Unwell*           | 16 | 37% | Required some sort of specialized newborn intervention |
|                                              | Stillbirth                  | 2  | 5%  |                                                        |
|                                              | Early neonatal Death <24 hr | 4  | 9%  | Includes 1 set of twins who both died                  |
| <b>Newborn Outcome (at Hospital), n = 12</b> |                             |    |     |                                                        |
| Newborn Referrals                            | Discharged by Provider      | 9  | 75% |                                                        |
|                                              | Death                       | 3  | 25% |                                                        |

| <b>Reason for Referral (Multiple reasons considered), n = 41</b> |                              |    |     |  |
|------------------------------------------------------------------|------------------------------|----|-----|--|
| Maternal Referrals                                               | Obstructed / Prolonged Labor | 16 | 39% |  |
|                                                                  | Anemia / Blood Transfusion   | 7  | 17% |  |

|  |                   |   |     |                                                                           |
|--|-------------------|---|-----|---------------------------------------------------------------------------|
|  | Hypertension      | 5 | 12% |                                                                           |
|  | Previous Cesarean | 4 | 10% |                                                                           |
|  | Bleeding          | 2 | 5%  |                                                                           |
|  | Breech Position   | 2 | 5%  |                                                                           |
|  | Placenta Previa   | 2 | 5%  |                                                                           |
|  | PROM              | 2 | 5%  |                                                                           |
|  | Ultrasound        | 2 | 5%  |                                                                           |
|  | OTHER             | 5 | 12% | (Injury, low blood pressure, multiparity, oligohydramnios, pre-eclampsia) |

**Reason for Admission (Multiple reasons considered), n = 37**

|                    |                              |    |     |                                                            |
|--------------------|------------------------------|----|-----|------------------------------------------------------------|
| Maternal Referrals | Obstructed / Prolonged Labor | 13 | 35% |                                                            |
|                    | Previous Cesarean            | 8  | 22% |                                                            |
|                    | Anemia                       | 7  | 19% |                                                            |
|                    | Hypertension                 | 4  | 11% |                                                            |
|                    | Bleeding                     | 2  | 5%  |                                                            |
|                    | Pre-eclampsia                | 2  | 5%  |                                                            |
|                    | OTHER                        | 4  | 11% | (Hypoxia, placenta previa, post-term, transverse position) |
|                    | Unrecorded / Missing Data    | 2  | 5%  |                                                            |

**Reason for Referral (Multiple reasons considered), n = 13**

|                   |                      |   |     |  |
|-------------------|----------------------|---|-----|--|
| Newborn Referrals | Respiratory Distress | 8 | 62% |  |
|                   | Infection            | 2 | 15% |  |
|                   | Hypoglycemia         | 2 | 15% |  |
|                   | Hypothermia          | 1 | 8%  |  |
|                   | Other                | 1 | 8%  |  |

**Reason for Admission (Multiple reasons considered), n = 12**

|                   |                      |   |     |  |
|-------------------|----------------------|---|-----|--|
| Newborn Referrals | Respiratory Distress | 9 | 75% |  |
|                   | Hypoglycemia         | 2 | 17% |  |
|                   | Infection            | 1 | 8%  |  |
|                   | Trouble Feeding      | 1 | 8%  |  |

# Standards for Reporting Qualitative Research (SRQR)\*

<http://www.equator-network.org/reporting-guidelines/srqr/>

Page/line no(s).

## Title and abstract

|                                                                                                                                                                                                                                                              |                              |
|--------------------------------------------------------------------------------------------------------------------------------------------------------------------------------------------------------------------------------------------------------------|------------------------------|
| <p><b>Title</b> - Concise description of the nature and topic of the study Identifying the study as qualitative or indicating the approach (e.g., ethnography, grounded theory) or data collection methods (e.g., interview, focus group) is recommended</p> | <p>Page 1<br/>Lines 1-2</p>  |
| <p><b>Abstract</b> - Summary of key elements of the study using the abstract format of the intended publication; typically includes background, purpose, methods, results, and conclusions</p>                                                               | <p>Page 2<br/>Lines 1-25</p> |

## Introduction

|                                                                                                                                                                     |                                 |
|---------------------------------------------------------------------------------------------------------------------------------------------------------------------|---------------------------------|
| <p><b>Problem formulation</b> - Description and significance of the problem/phenomenon studied; review of relevant theory and empirical work; problem statement</p> | <p>Page 4<br/>Lines 2 - 17</p>  |
| <p><b>Purpose or research question</b> - Purpose of the study and specific objectives or questions</p>                                                              | <p>Page 4<br/>Lines 38 - 41</p> |

## Methods

|                                                                                                                                                                                                                                                                                                                                                                                                             |                                   |
|-------------------------------------------------------------------------------------------------------------------------------------------------------------------------------------------------------------------------------------------------------------------------------------------------------------------------------------------------------------------------------------------------------------|-----------------------------------|
| <p><b>Qualitative approach and research paradigm</b> - Qualitative approach (e.g., ethnography, grounded theory, case study, phenomenology, narrative research) and guiding theory if appropriate; identifying the research paradigm (e.g., postpositivist, constructivist/ interpretivist) is also recommended; rationale**</p>                                                                            | <p>Pages 5-6</p>                  |
| <p><b>Researcher characteristics and reflexivity</b> - Researchers' characteristics that may influence the research, including personal attributes, qualifications/experience, relationship with participants, assumptions, and/or presuppositions; potential or actual interaction between researchers' characteristics and the research questions, approach, methods, results, and/or transferability</p> | <p>Page 5<br/>Lines 30 - 34</p>   |
| <p><b>Context</b> - Setting/site and salient contextual factors; rationale**</p>                                                                                                                                                                                                                                                                                                                            | <p>Page 5<br/>Lines 5 - 11</p>    |
| <p><b>Sampling strategy</b> - How and why research participants, documents, or events were selected; criteria for deciding when no further sampling was necessary (e.g., sampling saturation); rationale**</p>                                                                                                                                                                                              | <p>Page 5<br/>Lines 13 - 27</p>   |
| <p><b>Ethical issues pertaining to human subjects</b> - Documentation of approval by an appropriate ethics review board and participant consent, or explanation for lack thereof; other confidentiality and data security issues</p>                                                                                                                                                                        | <p>Page 16<br/>Lines 1-7</p>      |
| <p><b>Data collection methods</b> - Types of data collected; details of data collection procedures including (as appropriate) start and stop dates of data collection and analysis, iterative process, triangulation of sources/methods, and modification of procedures in response to evolving study findings; rationale**</p>                                                                             | <p>Page 5-6<br/>Lines 30 - 12</p> |

|    |                                                                                         |               |
|----|-----------------------------------------------------------------------------------------|---------------|
| 1  |                                                                                         |               |
| 2  |                                                                                         |               |
| 3  | <b>Data collection instruments and technologies</b> - Description of instruments (e.g., | Page 6        |
| 4  | interview guides, questionnaires) and devices (e.g., audio recorders) used for data     | Lines 3 - 14  |
| 5  | collection; if/how the instrument(s) changed over the course of the study               |               |
| 6  |                                                                                         |               |
| 7  | <b>Units of study</b> - Number and relevant characteristics of participants, documents, | Page 7        |
| 8  | or events included in the study; level of participation (could be reported in results)  | Lines 12-15   |
| 9  |                                                                                         |               |
| 10 | <b>Data processing</b> - Methods for processing data prior to and during analysis,      | Pages 6-7     |
| 11 | including transcription, data entry, data management and security, verification of      | Lines 16 - 4  |
| 12 | data integrity, data coding, and anonymization/de-identification of excerpts            |               |
| 13 |                                                                                         |               |
| 14 | <b>Data analysis</b> - Process by which inferences, themes, etc., were identified and   | Pages 6 – 7   |
| 15 | developed, including the researchers involved in data analysis; usually references a    | Lines 16 -4   |
| 16 | specific paradigm or approach; rationale**                                              |               |
| 17 |                                                                                         |               |
| 18 | <b>Techniques to enhance trustworthiness</b> - Techniques to enhance trustworthiness    | Page 6        |
| 19 | and credibility of data analysis (e.g., member checking, audit trail, triangulation);   | Lines 20 - 23 |
| 20 | rationale**                                                                             |               |

## Results/findings

|    |                                                                                             |              |
|----|---------------------------------------------------------------------------------------------|--------------|
| 23 | <b>Synthesis and interpretation</b> - Main findings (e.g., interpretations, inferences, and |              |
| 24 | themes); might include development of a theory or model, or integration with                | Pages 7 - 12 |
| 25 | prior research or theory                                                                    |              |
| 26 |                                                                                             |              |
| 27 | <b>Links to empirical data</b> - Evidence (e.g., quotes, field notes, text excerpts,        |              |
| 28 | photographs) to substantiate analytic findings                                              | Pages 8 - 12 |
| 29 |                                                                                             |              |

## Discussion

|    |                                                                                           |               |
|----|-------------------------------------------------------------------------------------------|---------------|
| 32 | <b>Integration with prior work, implications, transferability, and contribution(s) to</b> |               |
| 33 | <b>the field</b> - Short summary of main findings; explanation of how findings and        |               |
| 34 | conclusions connect to, support, elaborate on, or challenge conclusions of earlier        |               |
| 35 | scholarship; discussion of scope of application/generalizability; identification of       |               |
| 36 | unique contribution(s) to scholarship in a discipline or field                            | Pages 12 - 14 |
| 37 |                                                                                           |               |
| 38 |                                                                                           | Page 14       |
| 39 | <b>Limitations</b> - Trustworthiness and limitations of findings                          | Lines 7 - 25  |
| 40 |                                                                                           |               |

## Other

|    |                                                                                            |               |
|----|--------------------------------------------------------------------------------------------|---------------|
| 43 | <b>Conflicts of interest</b> - Potential sources of influence or perceived influence on    | Page 15       |
| 44 | study conduct and conclusions; how these were managed                                      | Line 30       |
| 45 |                                                                                            |               |
| 46 | <b>Funding</b> - Sources of funding and other support; role of funders in data collection, | Page 15       |
| 47 | interpretation, and reporting                                                              | Lines 20 - 28 |
| 48 |                                                                                            |               |

\*The authors created the SRQR by searching the literature to identify guidelines, reporting standards, and critical appraisal criteria for qualitative research; reviewing the reference lists of retrieved sources; and contacting experts to gain feedback. The SRQR aims to improve the transparency of all aspects of qualitative research by providing clear standards for reporting qualitative research.

1  
2  
3  
4  
5  
6  
7  
8  
9  
10  
11  
12  
13  
14  
15  
16  
17  
18  
19  
20  
21  
22  
23  
24  
25  
26  
27  
28  
29  
30  
31  
32  
33  
34  
35  
36  
37  
38  
39  
40  
41  
42  
43  
44  
45  
46  
47  
48  
49  
50  
51  
52  
53  
54  
55  
56  
57  
58  
59  
60

\*\*The rationale should briefly discuss the justification for choosing that theory, approach, method, or technique rather than other options available, the assumptions and limitations implicit in those choices, and how those choices influence study conclusions and transferability. As appropriate, the rationale for several items might be discussed together.

**Reference:**

O'Brien BC, Harris IB, Beckman TJ, Reed DA, Cook DA. **Standards for reporting qualitative research: a synthesis of recommendations.** *Academic Medicine*, Vol. 89, No. 9 / Sept 2014  
DOI: 10.1097/ACM.0000000000000388

For peer review only
