# Supplementary figures and images for: Factors that influence compliance for referral from primary care to hospital for maternal and neonatal complications in Bosaso, Somalia: a qualitative study
Source: PubMed Central journal article supplement — BMJ Open. 2023 Apr 13;13(4):e070036. doi: 10.1136/bmjopen-2022-070036 (PMC10106055; doi:10.1136/bmjopen-2022-070036), 2023-04-13

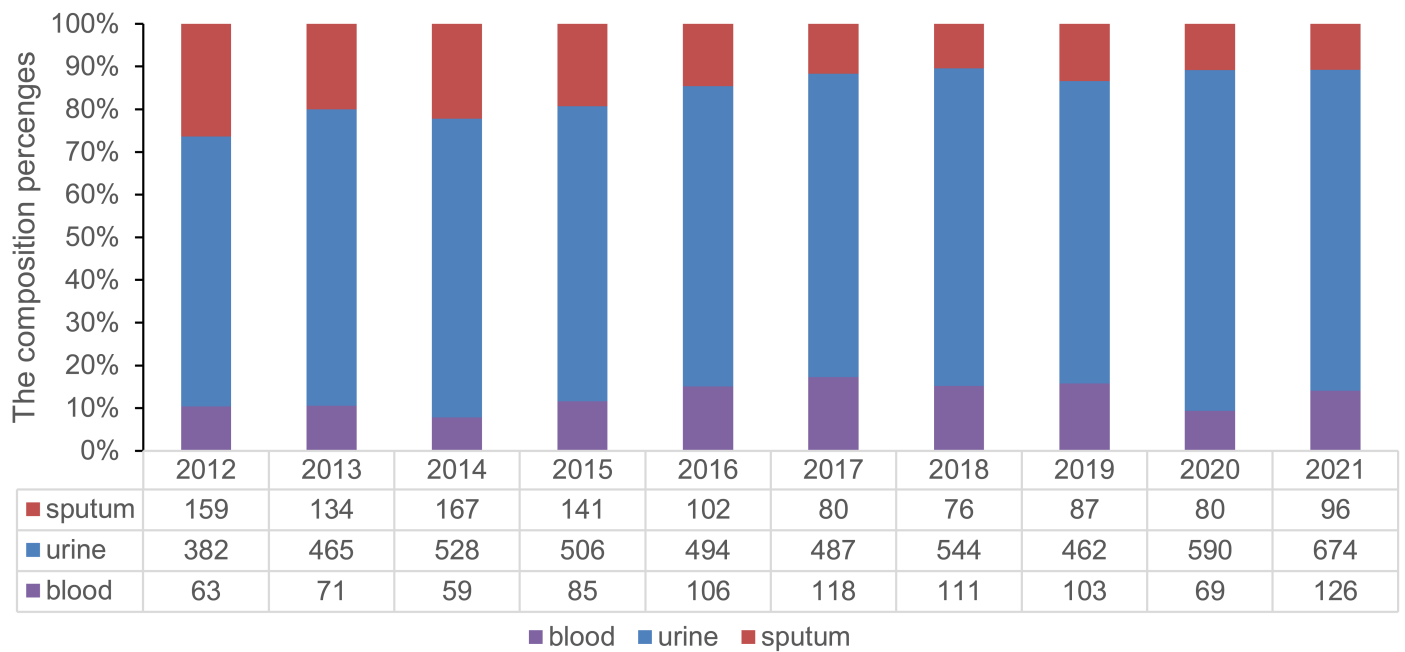

Supplement: bmjopen-2022-070036supp001.pdf [file bmjopen-2022-070036supp001.pdf]
